# Supplementary material for: Conservation and divergence of autonomous pathway genes in the flowering regulatory network of Beta vulgaris
Source: PubMed Central journal article supplement — J Exp Bot. 2010 Oct 25;62(10):3359–74. doi: 10.1093/jxb/erq321 (PMC3130164; doi:10.1093/jxb/erq321), 2010-10-25
Supplement: supp_erq321_00051938-file001.pdf [file supp_erq321_00051938-file001.pdf]

# **Conservation and divergence of autonomous pathway genes in the flowering regulatory network of *Beta vulgaris***

Salah F. Abou-Elwafa, Bianca Büttner, Tansy Chia, Gretel Schulze-Buxloh, Uwe Hohmann, Effie Mutasa-Göttgens, Christian Jung and Andreas E. Müller

## **Supplementary Material**

**Supplementary Table 1.** Primer sequences.

| Primer name | Sequence (5'->3')                 |
|-------------|-----------------------------------|
| A479        | ATTTTGCCGATTTTCGGAAC              |
| A477        | TGCAGAGCTTCATGGAACTG              |
| B476        | GGAGCTGCAAATTCCCGTCC              |
| A478        | ATACCAGTTGCAGGACCAGG              |
| B478        | GCGTGGACCGCTTGCTGCAACT            |
| B477        | GACTTGTGCCTCCAAGCCTTAA            |
| A039        | AACCCTTGAAGAGCAGTTTTGGC           |
| A064        | AGAGGTATTATACTATCGATCTACC         |
| A066        | GGTAGACGAGAAGTACAGCCAG            |
| A042        | CAGCAGCAACTCTAGGTTTAACAACC        |
| A043        | ACTATCCTTCAGAAATCGACATCGG         |
| A067        | GCTTCGGGATTCAACAGATCTC            |
| A033        | GTTTGGGCTGTTAAATAAGGTTGC          |
| A065        | CCAAACTCAACCCTCAACAGTG            |
| A396        | ATGGCAGAGGCAGACAAGG               |
| A397        | ATATCCATAATTTCCACCGTAAACTG        |
| A836        | ATGACGGAGAAAGGTAGAGGA             |
| A837        | TTAAGAGGGGCATGTCGTTAC             |
| A823        | GTTACTTCTTACCATCTGATCC            |
| A825        | TTGAACATGAACCCACCACC              |
| A067        | GCTTCGGGATTCAACAGATCTC            |
| A108        | CGTGTACATTCAACCTGTTGAAG           |
| B391        | CGAAGCTGATTAATCATGGAGG            |
| A046        | GCAAGGAGCTCGAGATCAGGC             |
| A043        | ACTATCCTTCAGAAATCGACATCGG         |
| B392        | GAGCAGTTGACGTCCCTAAG              |
| A068        | TACCAGAAGTTGGCGCTGGAG             |
| A069        | TAGGGGTAGGTGAAGGAAGAG             |
| A045        | CCATGGGATATTGAGATAGACTACG         |
| B396        | TTACCGCCTCCGATCACCAC              |
| B042        | GTCTGTGAACCCTCAAAAGTC             |
| B043        | ATGTTGGTACCTGCCCAAAG              |
| A066        | GGTAGACGAGAAGTACAGCCAG            |
| A042        | CAGCAGCAACTCTAGGTTTAACAACC        |
| A830        | TATGCTCCGCAGCAGCAACTCTAG          |
| A831        | TTCAGAGAGGTAAAGGCGCTGTTCGAT       |
| B336        | CGATAACCTGGTCAAGTCC               |
| B337        | CAGTCTCAAGGTGTTCTCCTCC            |
| B281        | GAGAGACGGTATTCCGTATG              |
| B282        | GCATGTGGACTCTAAGAAGG              |
| B349        | CTAGCTGCACCACTAAGTGC              |
| B350        | CGTTAAGAGCTGGAAGCACC              |
| A680        | GCCGCCTCGAGCAATATATGGCAGAGGCAGAG  |
| A652        | CACTTTAATACCTATAATTCAAAGTATTAGTAC |
| A896        | CAACGGAATTCCTACCGTACTACCCCTC      |
| A821        | TCTAAATGCGAGTTAACTGGAGC           |
| A901        | CGACTCGAGCTAGTCATGGCTGAAGC        |
| A938        | GACCCGGGTCATCAGTAACCGTAGCCTGAGC   |
| A875        | CAAGATCTCTGCCGACAGTGG             |
| A876        | AATATCATGCGATCATAGGCGTC           |
| B474        | GCTTTGACCGACCACTTCGC              |
| B475        | ACGCCGAGAGCAACTTGAA               |

**Supplementary Table 2.** Days to bolting and total number of leaves at bolting in 53 T2 families derived from transformation with *BvFLK* or *FLK* and non-transformed controls (Col-0 and *flk-1*). For T2 families in the Col-0 background, plants which bolted five or more days earlier than the mean of the Col-0 control plants (37.88±1.50 days to bolting) were classified as early bolting, all other plants as late bolting. For T2 families in the *flk-1* background, plants which bolted as late as the *flk-1* mutant controls (63-77 days to bolting) were considered as late bolting, whereas plants which bolted much earlier (25-44 days to bolting) and thus within a similar time range as Col-0 control plants (35-40 days to bolting) were classified as early bolting. The observed segregation ratios were tested by  $\chi^2$  analysis for deviation from the null hypotheses for dominant-recessive inheritance of one or two transgene loci (3:1 or 15:1, respectively). Six putative single transgene-locus families (indicated in bold letters) were tested by PCR for segregation of the transgene.

| T2 plants (genetic background; transgene cassette; family number / plant number) | Number of days to bolting | Total number of leaves at bolting |
|----------------------------------------------------------------------------------|---------------------------|-----------------------------------|
| Col-0; 35S:: <i>BvFLK</i> ; 3/1                                                  | 28                        | 16                                |
| Col-0; 35S:: <i>BvFLK</i> ; 3/2                                                  | 31                        | 16                                |
| Col-0; 35S:: <i>BvFLK</i> ; 3/3                                                  | 28                        | 13                                |
| Col-0; 35S:: <i>BvFLK</i> ; 3/4                                                  | 28                        | 13                                |
| Col-0; 35S:: <i>BvFLK</i> ; 3/5                                                  | 28                        | 15                                |
| Col-0; 35S:: <i>BvFLK</i> ; 3/6                                                  | 31                        | 18                                |
| Col-0; 35S:: <i>BvFLK</i> ; 3/7                                                  | 31                        | 15                                |
| Col-0; 35S:: <i>BvFLK</i> ; 3/8                                                  | 31                        | 21                                |
| Col-0; 35S:: <i>BvFLK</i> ; 3/9                                                  | 28                        | 18                                |
| Col-0; 35S:: <i>BvFLK</i> ; 3/10                                                 | 31                        | 16                                |
| Col-0; 35S:: <i>BvFLK</i> ; 3/11                                                 | 35                        | 15                                |
| Col-0; 35S:: <i>BvFLK</i> ; 3/12                                                 | 28                        | 13                                |
| Col-0; 35S:: <i>BvFLK</i> ; 3/13                                                 | 28                        | 13                                |
| Col-0; 35S:: <i>BvFLK</i> ; 3/14                                                 | 28                        | 11                                |
| Col-0; 35S:: <i>BvFLK</i> ; 3/15                                                 | 31                        | 16                                |
| Col-0; 35S:: <i>BvFLK</i> ; 3/16                                                 | 28                        | 14                                |
| Col-0; 35S:: <i>BvFLK</i> ; 3/17                                                 | 28                        | 14                                |
| Segregation ratio (early bolting: late bolting)                                  | 16:1                      |                                   |
| $\chi^2$ for 3:1                                                                 | 3.31 (ns) <b>a</b>        |                                   |
| $\chi^2$ for 15:1                                                                | 0.01 (ns)                 |                                   |
| Col-0; 35S:: <i>BvFLK</i> ; 5/1                                                  | 31                        | 20                                |
| Col-0; 35S:: <i>BvFLK</i> ; 5/2                                                  | -C                        | -                                 |
| Col-0; 35S:: <i>BvFLK</i> ; 5/3                                                  | 31                        | 21                                |
| Col-0; 35S:: <i>BvFLK</i> ; 5/4                                                  | 31                        | 19                                |
| Col-0; 35S:: <i>BvFLK</i> ; 5/5                                                  | 31                        | 18                                |
| Col-0; 35S:: <i>BvFLK</i> ; 5/6                                                  | 31                        | 22                                |
| Col-0; 35S:: <i>BvFLK</i> ; 5/7                                                  | 28                        | 17                                |
| Col-0; 35S:: <i>BvFLK</i> ; 5/8                                                  | 28                        | 14                                |
| Col-0; 35S:: <i>BvFLK</i> ; 5/9                                                  | 31                        | 17                                |
| Col-0; 35S:: <i>BvFLK</i> ; 5/10                                                 | 31                        | 18                                |
| Col-0; 35S:: <i>BvFLK</i> ; 5/11                                                 | 31                        | 21                                |
| Col-0; 35S:: <i>BvFLK</i> ; 5/12                                                 | 31                        | 17                                |
| Col-0; 35S:: <i>BvFLK</i> ; 5/13                                                 | 31                        | 12                                |
| Col-0; 35S:: <i>BvFLK</i> ; 5/14                                                 | 31                        | 18                                |
| Col-0; 35S:: <i>BvFLK</i> ; 5/15                                                 | 39                        | 15                                |

| T2 plants (genetic background; transgene cassette; family number / plant number) | Number of days to bolting | Total number of leaves at bolting |
|----------------------------------------------------------------------------------|---------------------------|-----------------------------------|
| Col-0; 35S:: <i>BvFLK</i> ; 4/1                                                  | 25                        | 14                                |
| Col-0; 35S:: <i>BvFLK</i> ; 4/2                                                  | 28                        | 11                                |
| Col-0; 35S:: <i>BvFLK</i> ; 4/3                                                  | 28                        | 15                                |
| Col-0; 35S:: <i>BvFLK</i> ; 4/4                                                  | 28                        | 15                                |
| Col-0; 35S:: <i>BvFLK</i> ; 4/5                                                  | 28                        | 16                                |
| Col-0; 35S:: <i>BvFLK</i> ; 4/6                                                  | 31                        | 15                                |
| Col-0; 35S:: <i>BvFLK</i> ; 4/7                                                  | 40                        | 22                                |
| Col-0; 35S:: <i>BvFLK</i> ; 4/8                                                  | 28                        | 17                                |
| Col-0; 35S:: <i>BvFLK</i> ; 4/9                                                  | 31                        | 15                                |
| Col-0; 35S:: <i>BvFLK</i> ; 4/10                                                 | 31                        | 19                                |
| Col-0; 35S:: <i>BvFLK</i> ; 4/11                                                 | 31                        | 17                                |
| Col-0; 35S:: <i>BvFLK</i> ; 4/12                                                 | 31                        | 12                                |
| Col-0; 35S:: <i>BvFLK</i> ; 4/13                                                 | 31                        | 17                                |
| Col-0; 35S:: <i>BvFLK</i> ; 4/14                                                 | 38                        | 16                                |
| Col-0; 35S:: <i>BvFLK</i> ; 4/15                                                 | 28                        | 14                                |
| Col-0; 35S:: <i>BvFLK</i> ; 4/16                                                 | 31                        | 14                                |
| Col-0; 35S:: <i>BvFLK</i> ; 4/17                                                 | 24                        | 14                                |
| Segregation ratio (early bolting: late bolting)                                  | 15:2                      |                                   |
| $\chi^2$ for 3:1                                                                 | 1.59 (ns)                 |                                   |
| $\chi^2$ for 15:1                                                                | 0.86 (ns)                 |                                   |
| Col-0; 35S:: <i>BvFLK</i> ; 6/1                                                  | 31                        | 13                                |
| Col-0; 35S:: <i>BvFLK</i> ; 6/2                                                  | 28                        | 16                                |
| Col-0; 35S:: <i>BvFLK</i> ; 6/3                                                  | 35                        | 13                                |
| Col-0; 35S:: <i>BvFLK</i> ; 6/4                                                  | -                         | -                                 |
| Col-0; 35S:: <i>BvFLK</i> ; 6/5                                                  | 24                        | 9                                 |
| Col-0; 35S:: <i>BvFLK</i> ; 6/6                                                  | 31                        | 14                                |
| Col-0; 35S:: <i>BvFLK</i> ; 6/7                                                  | 28                        | 15                                |
| Col-0; 35S:: <i>BvFLK</i> ; 6/8                                                  | 28                        | 13                                |
| Col-0; 35S:: <i>BvFLK</i> ; 6/9                                                  | 28                        | 15                                |
| Col-0; 35S:: <i>BvFLK</i> ; 6/10                                                 | 28                        | 13                                |
| Col-0; 35S:: <i>BvFLK</i> ; 6/11                                                 | 39                        | 17                                |
| Col-0; 35S:: <i>BvFLK</i> ; 6/12                                                 | 28                        | 13                                |
| Col-0; 35S:: <i>BvFLK</i> ; 6/13                                                 | 31                        | 12                                |
| Col-0; 35S:: <i>BvFLK</i> ; 6/14                                                 | 31                        | 14                                |
| Col-0; 35S:: <i>BvFLK</i> ; 6/15                                                 | 31                        | 15                                |

|                                                 |           |           |
|-------------------------------------------------|-----------|-----------|
| Col-0; 35S::BvFLK; 5/16                         | 31        | 15        |
| Col-0; 35S::BvFLK; 5/17                         | 31        | 18        |
| Segregation ratio (early bolting: late bolting) | 15:1      |           |
| X <sup>2</sup> for 3:1                          | 3.00 (ns) |           |
| X <sup>2</sup> for 15:1                         | 0.00 (ns) |           |
| <b>Col-0; 35S::BvFLK; 7/1</b>                   | <b>28</b> | <b>16</b> |
| <b>Col-0; 35S::BvFLK; 7/2<sup>b</sup></b>       | <b>40</b> | <b>18</b> |
| <b>Col-0; 35S::BvFLK; 7/3</b>                   | <b>28</b> | <b>11</b> |
| <b>Col-0; 35S::BvFLK; 7/4</b>                   | <b>28</b> | <b>13</b> |
| <b>Col-0; 35S::BvFLK; 7/5</b>                   | <b>28</b> | <b>16</b> |
| <b>Col-0; 35S::BvFLK; 7/6</b>                   | <b>29</b> | <b>15</b> |
| <b>Col-0; 35S::BvFLK; 7/7</b>                   | <b>33</b> | <b>15</b> |
| <b>Col-0; 35S::BvFLK; 7/8</b>                   | <b>24</b> | <b>15</b> |
| <b>Col-0; 35S::BvFLK; 7/9</b>                   | <b>28</b> | <b>14</b> |
| <b>Col-0; 35S::BvFLK; 7/10<sup>b</sup></b>      | <b>39</b> | <b>18</b> |
| <b>Col-0; 35S::BvFLK; 7/11</b>                  | <b>24</b> | <b>15</b> |
| <b>Col-0; 35S::BvFLK; 7/12<sup>b</sup></b>      | <b>38</b> | <b>19</b> |
| <b>Col-0; 35S::BvFLK; 7/13</b>                  | <b>25</b> | <b>17</b> |
| <b>Col-0; 35S::BvFLK; 7/14</b>                  | <b>24</b> | <b>17</b> |
| <b>Col-0; 35S::BvFLK; 7/15</b>                  | <b>31</b> | <b>17</b> |
| <b>Col-0; 35S::BvFLK; 7/16</b>                  | <b>31</b> | <b>17</b> |
| <b>Col-0; 35S::BvFLK; 7/17<sup>b</sup></b>      | <b>35</b> | <b>19</b> |
| Segregation ratio (early bolting: late bolting) | 13:4      |           |
| X <sup>2</sup> for 3:1                          | 0.02 (ns) |           |
| X <sup>2</sup> for 15:1                         | 8.56 **   |           |
| Col-0; 35S::BvFLK; 12/1                         | 25        | 12        |
| Col-0; 35S::BvFLK; 12/2                         | 31        | 18        |
| Col-0; 35S::BvFLK; 12/3                         | 25        | 13        |
| Col-0; 35S::BvFLK; 12/4                         | 25        | 14        |
| Col-0; 35S::BvFLK; 12/5                         | 31        | 18        |
| Col-0; 35S::BvFLK; 12/6                         | 25        | 16        |
| Col-0; 35S::BvFLK; 12/7                         | 28        | 21        |
| Col-0; 35S::BvFLK; 12/8                         | 28        | 12        |
| Col-0; 35S::BvFLK; 12/9                         | 28        | 14        |
| Col-0; 35S::BvFLK; 12/10                        | 24        | 13        |
| Col-0; 35S::BvFLK; 12/11                        | 28        | 12        |
| Col-0; 35S::BvFLK; 12/12                        | 25        | 17        |
| Col-0; 35S::BvFLK; 12/13                        | 28        | 15        |
| Col-0; 35S::BvFLK; 12/14                        | 28        | 14        |
| Col-0; 35S::BvFLK; 12/15                        | 28        | 14        |
| Col-0; 35S::BvFLK; 12/16                        | -         | -         |
| Col-0; 35S::BvFLK; 12/17                        | 24        | 17        |
| Segregation ratio (early bolting: late bolting) | 16: 0     |           |
| X <sup>2</sup> for 3:1                          | 5.33 **   |           |
| X <sup>2</sup> for 15:1                         | 1.07 (ns) |           |
| Col-0; 35S::BvFLK; 14/1                         | 28        | 15        |
| Col-0; 35S::BvFLK; 14/2                         | 28        | 14        |

|                                                 |           |    |
|-------------------------------------------------|-----------|----|
| Col-0; 35S::BvFLK; 6/16                         | 28        | 13 |
| Col-0; 35S::BvFLK; 6/17                         | 28        | 14 |
| Segregation ratio (early bolting: late bolting) | 14:2      |    |
| X <sup>2</sup> for 3:1                          | 1.33 (ns) |    |
| X <sup>2</sup> for 15:1                         | 1.07 (ns) |    |
| Col-0; 35S::BvFLK; 10/1                         | 28        | 11 |
| Col-0; 35S::BvFLK; 10/2                         | 31        | 12 |
| Col-0; 35S::BvFLK; 10/3                         | 28        | 9  |
| Col-0; 35S::BvFLK; 10/4                         | 38        | 15 |
| Col-0; 35S::BvFLK; 10/5                         | 28        | 12 |
| Col-0; 35S::BvFLK; 10/6                         | 28        | 16 |
| Col-0; 35S::BvFLK; 10/7                         | 28        | 16 |
| Col-0; 35S::BvFLK; 10/8                         | 28        | 14 |
| Col-0; 35S::BvFLK; 10/9                         | 28        | 11 |
| Col-0; 35S::BvFLK; 10/10                        | 31        | 14 |
| Col-0; 35S::BvFLK; 10/11                        | 28        | 13 |
| Col-0; 35S::BvFLK; 10/12                        | 31        | 18 |
| Col-0; 35S::BvFLK; 10/13                        | 28        | 21 |
| Col-0; 35S::BvFLK; 10/14                        | -         | -  |
| Col-0; 35S::BvFLK; 10/15                        | 24        | 13 |
| Col-0; 35S::BvFLK; 10/16                        | 28        | 17 |
| Col-0; 35S::BvFLK; 10/17                        | 28        | 17 |
| Segregation ratio (early bolting: late bolting) | 15: 1     |    |
| X <sup>2</sup> for 3:1                          | 3.00 (ns) |    |
| X <sup>2</sup> for 15:1                         | 0.00 (ns) |    |
| Col-0; 35S::BvFLK; 13/1                         | 28        | 14 |
| Col-0; 35S::BvFLK; 13/2                         | 31        | 16 |
| Col-0; 35S::BvFLK; 13/3                         | 39        | 18 |
| Col-0; 35S::BvFLK; 13/4                         | 28        | 13 |
| Col-0; 35S::BvFLK; 13/5                         | 31        | 14 |
| Col-0; 35S::BvFLK; 13/6                         | 31        | 16 |
| Col-0; 35S::BvFLK; 13/7                         | 28        | 14 |
| Col-0; 35S::BvFLK; 13/8                         | 28        | 13 |
| Col-0; 35S::BvFLK; 13/9                         | 31        | 16 |
| Col-0; 35S::BvFLK; 13/10                        | 38        | 18 |
| Col-0; 35S::BvFLK; 13/11                        | 31        | 18 |
| Col-0; 35S::BvFLK; 13/12                        | 31        | 15 |
| Col-0; 35S::BvFLK; 13/13                        | 31        | 16 |
| Col-0; 35S::BvFLK; 13/14                        | 31        | 17 |
| Col-0; 35S::BvFLK; 13/15                        | 25        | 15 |
| Col-0; 35S::BvFLK; 13/16                        | 31        | 18 |
| Col-0; 35S::BvFLK; 13/17                        | 28        | 14 |
| Segregation ratio (early bolting: late bolting) | 15:2      |    |
| X <sup>2</sup> for 3:1                          | 1.59 (ns) |    |
| X <sup>2</sup> for 15:1                         | 0.86 (ns) |    |
| Col-0; 35S::BvFLK; 21/1                         | 38        | 18 |
| Col-0; 35S::BvFLK; 21/2                         | 28        | 19 |

|                                                    |           |    |
|----------------------------------------------------|-----------|----|
| Col-0; 35S::BvFLK; 14/3                            | 38        | 16 |
| Col-0; 35S::BvFLK; 14/4                            | 31        | 15 |
| Col-0; 35S::BvFLK; 14/5                            | 31        | 17 |
| Col-0; 35S::BvFLK; 14/6                            | 28        | 14 |
| Col-0; 35S::BvFLK; 14/7                            | 39        | 12 |
| Col-0; 35S::BvFLK; 14/8                            | 31        | 18 |
| Col-0; 35S::BvFLK; 14/9                            | 31        | 17 |
| Col-0; 35S::BvFLK; 14/10                           | 31        | 15 |
| Col-0; 35S::BvFLK; 14/11                           | 31        | 15 |
| Col-0; 35S::BvFLK; 14/12                           | 28        | 14 |
| Col-0; 35S::BvFLK; 14/13                           | 31        | 16 |
| Col-0; 35S::BvFLK; 14/14                           | 31        | 18 |
| Col-0; 35S::BvFLK; 14/15                           | 28        | 12 |
| Col-0; 35S::BvFLK; 14/16                           | 31        | 14 |
| Col-0; 35S::BvFLK; 14/17                           | 31        | 18 |
| Segregation ratio (early bolting:<br>late bolting) | 15:2      |    |
| $X^2$ for 3:1                                      | 1.59 (ns) |    |
| $X^2$ for 15:1                                     | 0.86 (ns) |    |

|                                                    |           |    |
|----------------------------------------------------|-----------|----|
| Col-0; 35S::BvFLK; 21/3                            | 28        | 17 |
| Col-0; 35S::BvFLK; 21/4                            | 24        | 15 |
| Col-0; 35S::BvFLK; 21/5                            | 25        | 14 |
| Col-0; 35S::BvFLK; 21/6                            | 28        | 13 |
| Col-0; 35S::BvFLK; 21/7                            | 28        | 14 |
| Col-0; 35S::BvFLK; 21/8                            | 24        | 12 |
| Col-0; 35S::BvFLK; 21/9                            | 28        | 12 |
| Col-0; 35S::BvFLK; 21/10                           | 24        | 14 |
| Col-0; 35S::BvFLK; 21/11                           | 28        | 16 |
| Col-0; 35S::BvFLK; 21/12                           | 25        | 16 |
| Col-0; 35S::BvFLK; 21/13                           | 25        | 15 |
| Col-0; 35S::BvFLK; 21/14                           | 24        | 13 |
| Col-0; 35S::BvFLK; 21/15                           | 25        | 16 |
| Col-0; 35S::BvFLK; 21/16                           | 39        | 21 |
| Col-0; 35S::BvFLK; 21/17                           | 28        | 17 |
| Segregation ratio (early bolting:<br>late bolting) | 15:2      |    |
| $X^2$ for 3:1                                      | 1.59 (ns) |    |
| $X^2$ for 15:1                                     | 0.86 (ns) |    |

| T2 plants (genetic background; transgene cassette; family number / plant number) | Number of days to bolting | Total number of leaves at bolting |
|----------------------------------------------------------------------------------|---------------------------|-----------------------------------|
| Col-0; endo::BvFLK; 2/1                                                          | 25                        | 14                                |
| Col-0; endo::BvFLK; 2/2                                                          | 38                        | 17                                |
| Col-0; endo::BvFLK; 2/3                                                          | 28                        | 16                                |
| Col-0; endo::BvFLK; 2/4                                                          | 28                        | 16                                |
| Col-0; endo::BvFLK; 2/5                                                          | 25                        | 14                                |
| Col-0; endo::BvFLK; 2/6                                                          | 35                        | 6                                 |
| Col-0; endo::BvFLK; 2/7                                                          | 24                        | 14                                |
| Col-0; endo::BvFLK; 2/8                                                          | -                         | -                                 |
| Col-0; endo::BvFLK; 2/9                                                          | 25                        | 13                                |
| Col-0; endo::BvFLK; 2/10                                                         | 24                        | 14                                |
| Col-0; endo::BvFLK; 2/11                                                         | 28                        | 15                                |
| Col-0; endo::BvFLK; 2/12                                                         | 25                        | 12                                |
| Col-0; endo::BvFLK; 2/13                                                         | 31                        | 18                                |
| Col-0; endo::BvFLK; 2/14                                                         | 25                        | 14                                |
| Col-0; endo::BvFLK; 2/15                                                         | 28                        | 15                                |
| Col-0; endo::BvFLK; 2/16                                                         | 24                        | 12                                |
| Col-0; endo::BvFLK; 2/17                                                         | 25                        | 14                                |
| Segregation ratio (early bolting: late bolting)                                  | 16:0                      |                                   |
| X <sup>2</sup> for 3:1                                                           | 5.33 **                   |                                   |
| X <sup>2</sup> for 15:1                                                          | 1.07 (ns)                 |                                   |
| Col-0; endo::BvFLK; 4/1                                                          | 28                        | 13                                |
| Col-0; endo::BvFLK; 4/2                                                          | 31                        | 18                                |
| Col-0; endo::BvFLK; 4/3                                                          | 31                        | 17                                |
| Col-0; endo::BvFLK; 4/4                                                          | 28                        | 16                                |
| Col-0; endo::BvFLK; 4/5                                                          | 28                        | 15                                |
| Col-0; endo::BvFLK; 4/6                                                          | 28                        | 18                                |
| Col-0; endo::BvFLK; 4/7                                                          | 25                        | 9                                 |
| Col-0; endo::BvFLK; 4/8                                                          | 25                        | 12                                |
| Col-0; endo::BvFLK; 4/9                                                          | 28                        | 16                                |
| Col-0; endo::BvFLK; 4/10                                                         | 31                        | 15                                |
| Col-0; endo::BvFLK; 4/11                                                         | 28                        | 17                                |
| Col-0; endo::BvFLK; 4/12                                                         | 31                        | 19                                |
| Col-0; endo::BvFLK; 4/13                                                         | 28                        | 14                                |
| Col-0; endo::BvFLK; 4/14                                                         | 24                        | 13                                |
| Col-0; endo::BvFLK; 4/15                                                         | 31                        | 18                                |
| Col-0; endo::BvFLK; 4/16                                                         | 28                        | 15                                |
| Col-0; endo::BvFLK; 4/17                                                         | 28                        | 14                                |
| Segregation ratio (early bolting: late bolting)                                  | 17:0                      |                                   |
| X <sup>2</sup> for 3:1                                                           | 6.08 **                   |                                   |
| X <sup>2</sup> for 15:1                                                          | 1.14 (ns)                 |                                   |
| <b>Col-0; endo::BvFLK; 6/1<sup>d</sup></b>                                       | <b>38</b>                 | <b>18</b>                         |
| <b>Col-0; endo::BvFLK; 6/2</b>                                                   | <b>28</b>                 | <b>15</b>                         |
| <b>Col-0; endo::BvFLK; 6/3</b>                                                   | <b>28</b>                 | <b>15</b>                         |
| <b>Col-0; endo::BvFLK; 6/4</b>                                                   | <b>25</b>                 | <b>12</b>                         |
| <b>Col-0; endo::BvFLK; 6/5</b>                                                   | <b>28</b>                 | <b>14</b>                         |

| T2 plants (genetic background; transgene cassette; family number / plant number) | Number of days to bolting | Total number of leaves at bolting |
|----------------------------------------------------------------------------------|---------------------------|-----------------------------------|
| Col-0; endo::BvFLK; 3/1                                                          | 31                        | 18                                |
| Col-0; endo::BvFLK; 3/2                                                          | 31                        | 14                                |
| Col-0; endo::BvFLK; 3/3                                                          | 28                        | 15                                |
| Col-0; endo::BvFLK; 3/4                                                          | 31                        | 16                                |
| Col-0; endo::BvFLK; 3/5                                                          | 31                        | 18                                |
| Col-0; endo::BvFLK; 3/6                                                          | 28                        | 16                                |
| Col-0; endo::BvFLK; 3/7                                                          | 28                        | 15                                |
| Col-0; endo::BvFLK; 3/8                                                          | 28                        | 17                                |
| Col-0; endo::BvFLK; 3/9                                                          | 31                        | 18                                |
| Col-0; endo::BvFLK; 3/10                                                         | 28                        | 13                                |
| Col-0; endo::BvFLK; 3/11                                                         | 28                        | 15                                |
| Col-0; endo::BvFLK; 3/12                                                         | 31                        | 18                                |
| Col-0; endo::BvFLK; 3/13                                                         | 31                        | 19                                |
| Col-0; endo::BvFLK; 3/14                                                         | 31                        | 15                                |
| Col-0; endo::BvFLK; 3/15                                                         | 31                        | 17                                |
| Col-0; endo::BvFLK; 3/16                                                         | -                         | -                                 |
| Col-0; endo::BvFLK; 3/17                                                         | 31                        | 15                                |
| Segregation ratio (early bolting: late bolting)                                  | 16:0                      |                                   |
| X <sup>2</sup> for 3:1                                                           | 5.33 **                   |                                   |
| X <sup>2</sup> for 15:1                                                          | 1.07 (ns)                 |                                   |
| Col-0; endo::BvFLK; 5/1                                                          | 28                        | 16                                |
| Col-0; endo::BvFLK; 5/2                                                          | 35                        | 15                                |
| Col-0; endo::BvFLK; 5/3                                                          | 28                        | 17                                |
| Col-0; endo::BvFLK; 5/4                                                          | 28                        | 13                                |
| Col-0; endo::BvFLK; 5/5                                                          | 31                        | 17                                |
| Col-0; endo::BvFLK; 5/6                                                          | 38                        | 15                                |
| Col-0; endo::BvFLK; 5/7                                                          | 31                        | 19                                |
| Col-0; endo::BvFLK; 5/8                                                          | 28                        | 18                                |
| Col-0; endo::BvFLK; 5/9                                                          | 31                        | 19                                |
| Col-0; endo::BvFLK; 5/10                                                         | 28                        | 16                                |
| Col-0; endo::BvFLK; 5/11                                                         | 28                        | 14                                |
| Col-0; endo::BvFLK; 5/12                                                         | 28                        | 18                                |
| Col-0; endo::BvFLK; 5/13                                                         | 31                        | 16                                |
| Col-0; endo::BvFLK; 5/14                                                         | 28                        | 14                                |
| Col-0; endo::BvFLK; 5/15                                                         | 28                        | 16                                |
| Col-0; endo::BvFLK; 5/16                                                         | 28                        | 13                                |
| Col-0; endo::BvFLK; 5/17                                                         | 28                        | 19                                |
| Segregation ratio (early bolting: late bolting)                                  | 15:2                      |                                   |
| X <sup>2</sup> for 3:1                                                           | 1.59 (ns)                 |                                   |
| X <sup>2</sup> for 15:1                                                          | 0.86 (ns)                 |                                   |
| Col-0; endo::BvFLK; 11/1                                                         | 31                        | 23                                |
| Col-0; endo::BvFLK; 11/2                                                         | 31                        | 24                                |
| Col-0; endo::BvFLK; 11/3                                                         | 31                        | 18                                |
| Col-0; endo::BvFLK; 11/4                                                         | 28                        | 15                                |
| Col-0; endo::BvFLK; 11/5                                                         | 28                        | 13                                |

|                                                    |           |    |
|----------------------------------------------------|-----------|----|
| Col-0; endo::BvFLK; 6/6 <sup>b</sup>               | 28        | 16 |
| Col-0; endo::BvFLK; 6/7                            | 28        | 16 |
| Col-0; endo::BvFLK; 6/8                            | 38        | 16 |
| Col-0; endo::BvFLK; 6/9                            | 28        | 17 |
| Col-0; endo::BvFLK; 6/10                           | 28        | 18 |
| Col-0; endo::BvFLK; 6/11                           | 28        | 13 |
| Col-0; endo::BvFLK; 6/12                           | 31        | 14 |
| Col-0; endo::BvFLK; 6/13 <sup>b</sup>              | 37        | 16 |
| Col-0; endo::BvFLK; 6/14 <sup>b</sup>              | 38        | 18 |
| Col-0; endo::BvFLK; 6/15                           | 28        | 16 |
| Col-0; endo::BvFLK; 6/16                           | 31        | 17 |
| Col-0; endo::BvFLK; 6/17                           | 31        | 16 |
| Segregation ratio (early bolting:<br>late bolting) | 13:4      |    |
| X <sup>2</sup> for 3:1                             | 0.02 (ns) |    |
| X <sup>2</sup> for 15:1                            | 8.56 **   |    |
| Col-0; endo::BvFLK; 12/1                           | 31        | 15 |
| Col-0; endo::BvFLK; 12/2                           | 38        | 15 |
| Col-0; endo::BvFLK; 12/3                           | 31        | 18 |
| Col-0; endo::BvFLK; 12/4                           | 35        | 15 |
| Col-0; endo::BvFLK; 12/5                           | 31        | 17 |
| Col-0; endo::BvFLK; 12/6                           | 28        | 15 |
| Col-0; endo::BvFLK; 12/7                           | 31        | 17 |
| Col-0; endo::BvFLK; 12/8                           | 31        | 16 |
| Col-0; endo::BvFLK; 12/9                           | 31        | 18 |
| Col-0; endo::BvFLK; 12/10                          | 28        | 11 |
| Col-0; endo::BvFLK; 12/11                          | 31        | 18 |
| Col-0; endo::BvFLK; 12/12                          | 31        | 11 |
| Col-0; endo::BvFLK; 12/13                          | 31        | 17 |
| Col-0; endo::BvFLK; 12/14                          | 31        | 19 |
| Col-0; endo::BvFLK; 12/15                          | 31        | 17 |
| Col-0; endo::BvFLK; 12/16                          | 31        | 18 |
| Col-0; endo::BvFLK; 12/17                          | 31        | 19 |
| Segregation ratio (early bolting:<br>late bolting) | 15:2      |    |
| X <sup>2</sup> for 3:1                             | 1.59 (ns) |    |
| X <sup>2</sup> for 15:1                            | 0.86 (ns) |    |
| Col-0; endo::BvFLK; 15/1                           | 31        | 18 |
| Col-0; endo::BvFLK; 15/2                           | 28        | 13 |
| Col-0; endo::BvFLK; 15/3                           | 28        | 16 |
| Col-0; endo::BvFLK; 15/4                           | -         | -  |
| Col-0; endo::BvFLK; 15/5                           | 25        | 14 |
| Col-0; endo::BvFLK; 15/6                           | 28        | 16 |
| Col-0; endo::BvFLK; 15/7                           | 25        | 16 |
| Col-0; endo::BvFLK; 15/8                           | 28        | 12 |
| Col-0; endo::BvFLK; 15/9                           | 24        | 18 |
| Col-0; endo::BvFLK; 15/10                          | 38        | 18 |
| Col-0; endo::BvFLK; 15/11                          | 31        | 12 |
| Col-0; endo::BvFLK; 15/12                          | -         | -  |
| Col-0; endo::BvFLK; 15/13                          | 31        | 14 |

|                                                    |           |    |
|----------------------------------------------------|-----------|----|
| Col-0; endo::BvFLK; 11/6                           | -         | -  |
| Col-0; endo::BvFLK; 11/7                           | 31        | 19 |
| Col-0; endo::BvFLK; 11/8                           | 31        | 19 |
| Col-0; endo::BvFLK; 11/9                           | 28        | 18 |
| Col-0; endo::BvFLK; 11/10                          | 31        | 20 |
| Col-0; endo::BvFLK; 11/11                          | 31        | 18 |
| Col-0; endo::BvFLK; 11/12                          | 31        | 17 |
| Col-0; endo::BvFLK; 11/13                          | 31        | 21 |
| Col-0; endo::BvFLK; 11/14                          | 28        | 15 |
| Col-0; endo::BvFLK; 11/15                          | 28        | 16 |
| Col-0; endo::BvFLK; 11/16                          | 31        | 20 |
| Col-0; endo::BvFLK; 11/17                          | 31        | 19 |
| Segregation ratio (early bolting:<br>late bolting) | 16:0      |    |
| X <sup>2</sup> for 3:1                             | 5.33 **   |    |
| X <sup>2</sup> for 15:1                            | 1.07 (ns) |    |
| Col-0; endo::BvFLK; 13/1                           | 28        | 16 |
| Col-0; endo::BvFLK; 13/2                           | 28        | 18 |
| Col-0; endo::BvFLK; 13/3                           | 28        | 14 |
| Col-0; endo::BvFLK; 13/4                           | 24        | 14 |
| Col-0; endo::BvFLK; 13/5                           | 24        | 12 |
| Col-0; endo::BvFLK; 13/6                           | 28        | 14 |
| Col-0; endo::BvFLK; 13/7                           | 28        | 12 |
| Col-0; endo::BvFLK; 13/8                           | 28        | 16 |
| Col-0; endo::BvFLK; 13/9                           | 28        | 16 |
| Col-0; endo::BvFLK; 13/10                          | 31        | 23 |
| Col-0; endo::BvFLK; 13/11                          | 28        | 16 |
| Col-0; endo::BvFLK; 13/12                          | 25        | 14 |
| Col-0; endo::BvFLK; 13/13                          | 28        | 18 |
| Col-0; endo::BvFLK; 13/14                          | 31        | 20 |
| Col-0; endo::BvFLK; 13/15                          | 31        | 17 |
| Col-0; endo::BvFLK; 13/16                          | 25        | 13 |
| Col-0; endo::BvFLK; 13/17                          | -         | -  |
| Segregation ratio (early bolting:<br>late bolting) | 16:0      |    |
| X <sup>2</sup> for 3:1                             | 5.33 **   |    |
| X <sup>2</sup> for 15:1                            | 1.07 (ns) |    |
| Col-0; endo::BvFLK; 16/1                           | 31        | 15 |
| Col-0; endo::BvFLK; 16/2                           | 38        | 15 |
| Col-0; endo::BvFLK; 16/3                           | 31        | 18 |
| Col-0; endo::BvFLK; 16/4                           | 35        | 15 |
| Col-0; endo::BvFLK; 16/5                           | 31        | 17 |
| Col-0; endo::BvFLK; 16/6                           | 28        | 15 |
| Col-0; endo::BvFLK; 16/7                           | 31        | 17 |
| Col-0; endo::BvFLK; 16/8                           | 31        | 16 |
| Col-0; endo::BvFLK; 16/9                           | 31        | 18 |
| Col-0; endo::BvFLK; 16/10                          | 28        | 11 |
| Col-0; endo::BvFLK; 16/11                          | 35        | 18 |
| Col-0; endo::BvFLK; 16/12                          | 31        | 11 |
| Col-0; endo::BvFLK; 16/13                          | 31        | 17 |

|                                                    |           |    |
|----------------------------------------------------|-----------|----|
| Col-0; endo:: <i>BvFLK</i> ; 15/14                 | 31        | 14 |
| Col-0; endo:: <i>BvFLK</i> ; 15/15                 | 28        | 15 |
| Col-0; endo:: <i>BvFLK</i> ; 15/16                 | 25        | 15 |
| Col-0; endo:: <i>BvFLK</i> ; 15/17                 | 31        | 13 |
| Segregation ratio (early bolting:<br>late bolting) | 15:0      |    |
| $\chi^2$ for 3:1                                   | 5.00 *    |    |
| $\chi^2$ for 15:1                                  | 1.00 (ns) |    |

|                                                    |           |    |
|----------------------------------------------------|-----------|----|
| Col-0; endo:: <i>BvFLK</i> ; 16/14                 | 31        | 19 |
| Col-0; endo:: <i>BvFLK</i> ; 16/15                 | 31        | 17 |
| Col-0; endo:: <i>BvFLK</i> ; 16/16                 | 31        | 18 |
| Col-0; endo:: <i>BvFLK</i> ; 16/17                 | 31        | 19 |
| Segregation ratio (early bolting:<br>late bolting) | 17:0      |    |
| $\chi^2$ for 3:1                                   | 6.08 **   |    |
| $\chi^2$ for 15:1                                  | 1.14 (ns) |    |



| T2 plants (genetic background; transgene cassette; family number / plant number) | Number of days to bolting | Total number of leaves at bolting |
|----------------------------------------------------------------------------------|---------------------------|-----------------------------------|
| Col-0; 35S::AtFLK; 1/1                                                           | 31                        | 17                                |
| Col-0; 35S::AtFLK; 1/2                                                           | 31                        | 18                                |
| Col-0; 35S::AtFLK; 1/3                                                           | 31                        | 15                                |
| Col-0; 35S::AtFLK; 1/4                                                           | 28                        | 14                                |
| Col-0; 35S::AtFLK; 1/5                                                           | 31                        | 17                                |
| Col-0; 35S::AtFLK; 1/6                                                           | 31                        | 15                                |
| Col-0; 35S::AtFLK; 1/7                                                           | 38                        | 15                                |
| Col-0; 35S::AtFLK; 1/8                                                           | 31                        | 15                                |
| Col-0; 35S::AtFLK; 1/9                                                           | 35                        | 14                                |
| Col-0; 35S::AtFLK; 1/10                                                          | 31                        | 15                                |
| Col-0; 35S::AtFLK; 1/11                                                          | 31                        | 15                                |
| Col-0; 35S::AtFLK; 1/12                                                          | 28                        | 13                                |
| Col-0; 35S::AtFLK; 1/13                                                          | 40                        | 18                                |
| Col-0; 35S::AtFLK; 1/14                                                          | 28                        | 14                                |
| Col-0; 35S::AtFLK; 1/15                                                          | 31                        | 17                                |
| Col-0; 35S::AtFLK; 1/16                                                          | 31                        | 16                                |
| Col-0; 35S::AtFLK; 1/17                                                          | 28                        | 14                                |
| Segregation ratio (early bolting: late bolting)                                  | 15:2                      |                                   |
| X <sup>2</sup> for 3:1                                                           | 1.59 (ns)                 |                                   |
| X <sup>2</sup> for 15:1                                                          | 0.86 (ns)                 |                                   |
| Col-0; 35S::AtFLK; 3/1                                                           | 25                        | 11                                |
| Col-0; 35S::AtFLK; 3/2                                                           | 28                        | 13                                |
| Col-0; 35S::AtFLK; 3/3                                                           | 31                        | 18                                |
| Col-0; 35S::AtFLK; 3/4                                                           | 28                        | 15                                |
| Col-0; 35S::AtFLK; 3/5                                                           | 25                        | 13                                |
| Col-0; 35S::AtFLK; 3/6                                                           | 28                        | 12                                |
| Col-0; 35S::AtFLK; 3/7                                                           | 25                        | 13                                |
| Col-0; 35S::AtFLK; 3/8                                                           | 25                        | 15                                |
| Col-0; 35S::AtFLK; 3/9                                                           | 28                        | 14                                |
| Col-0; 35S::AtFLK; 3/10                                                          | 25                        | 12                                |
| Col-0; 35S::AtFLK; 3/11                                                          | 24                        | 12                                |
| Col-0; 35S::AtFLK; 3/12                                                          | 28                        | 13                                |
| Col-0; 35S::AtFLK; 3/13                                                          | 28                        | 12                                |
| Col-0; 35S::AtFLK; 3/14                                                          | 28                        | 11                                |
| Col-0; 35S::AtFLK; 3/15                                                          | 25                        | 13                                |
| Col-0; 35S::AtFLK; 3/16                                                          | 24                        | 13                                |
| Col-0; 35S::AtFLK; 3/17                                                          | 25                        | 13                                |
| Segregation ratio (early bolting: late bolting)                                  | 17:0                      |                                   |
| X <sup>2</sup> for 3:1                                                           | 6.08 **                   |                                   |
| X <sup>2</sup> for 15:1                                                          | 1.14 (ns)                 |                                   |
| <b>Col-0; 35S::AtFLK; 5/1</b>                                                    | <b>25</b>                 | <b>15</b>                         |
| <b>Col-0; 35S::AtFLK; 5/2</b>                                                    | <b>27</b>                 | <b>14</b>                         |
| <b>Col-0; 35S::AtFLK; 5/3</b>                                                    | <b>27</b>                 | <b>15</b>                         |
| <b>Col-0; 35S::AtFLK; 5/4</b>                                                    | <b>27</b>                 | <b>18</b>                         |
| <b>Col-0; 35S::AtFLK; 5/5</b>                                                    | <b>27</b>                 | <b>13</b>                         |

| T2 plants (genetic background; transgene cassette; family number / plant number) | Number of days to bolting | Total number of leaves at bolting |
|----------------------------------------------------------------------------------|---------------------------|-----------------------------------|
| Col-0; 35S::AtFLK; 2/1                                                           | 25                        | 12                                |
| Col-0; 35S::AtFLK; 2/2                                                           | 25                        | 13                                |
| Col-0; 35S::AtFLK; 2/3                                                           | 25                        | 15                                |
| Col-0; 35S::AtFLK; 2/4                                                           | 25                        | 16                                |
| Col-0; 35S::AtFLK; 2/5                                                           | 25                        | 13                                |
| Col-0; 35S::AtFLK; 2/6                                                           | 25                        | 13                                |
| Col-0; 35S::AtFLK; 2/7                                                           | 25                        | 15                                |
| Col-0; 35S::AtFLK; 2/8                                                           | 25                        | 17                                |
| Col-0; 35S::AtFLK; 2/9                                                           | 25                        | 13                                |
| Col-0; 35S::AtFLK; 2/10                                                          | 28                        | 15                                |
| Col-0; 35S::AtFLK; 2/11                                                          | 28                        | 12                                |
| Col-0; 35S::AtFLK; 2/12                                                          | 28                        | 12                                |
| Col-0; 35S::AtFLK; 2/13                                                          | 28                        | 15                                |
| Col-0; 35S::AtFLK; 2/14                                                          | 24                        | 12                                |
| Col-0; 35S::AtFLK; 2/15                                                          | 28                        | 15                                |
| Col-0; 35S::AtFLK; 2/16                                                          | 28                        | 16                                |
| Col-0; 35S::AtFLK; 2/17                                                          | 28                        | 14                                |
| Segregation ratio (early bolting: late bolting)                                  | 17:0                      |                                   |
| X <sup>2</sup> for 3:1                                                           | 6.08 **                   |                                   |
| X <sup>2</sup> for 15:1                                                          | 1.14 (ns)                 |                                   |
| Col-0; 35S::AtFLK; 4/1                                                           | 25                        | 11                                |
| Col-0; 35S::AtFLK; 4/2                                                           | 28                        | 15                                |
| Col-0; 35S::AtFLK; 4/3                                                           | 31                        | 14                                |
| Col-0; 35S::AtFLK; 4/4                                                           | 28                        | 16                                |
| Col-0; 35S::AtFLK; 4/5                                                           | 31                        | 15                                |
| Col-0; 35S::AtFLK; 4/6                                                           | 28                        | 14                                |
| Col-0; 35S::AtFLK; 4/7                                                           | 28                        | 12                                |
| Col-0; 35S::AtFLK; 4/8                                                           | 35                        | 15                                |
| Col-0; 35S::AtFLK; 4/9                                                           | 28                        | 13                                |
| Col-0; 35S::AtFLK; 4/10                                                          | 31                        | 14                                |
| Col-0; 35S::AtFLK; 4/11                                                          | 28                        | 15                                |
| Col-0; 35S::AtFLK; 4/12                                                          | 31                        | 16                                |
| Col-0; 35S::AtFLK; 4/13                                                          | 31                        | 18                                |
| Col-0; 35S::AtFLK; 4/14                                                          | 38                        | 17                                |
| Col-0; 35S::AtFLK; 4/15                                                          | 28                        | 14                                |
| Col-0; 35S::AtFLK; 4/16                                                          | 28                        | 12                                |
| Col-0; 35S::AtFLK; 4/17                                                          | 28                        | 14                                |
| Segregation ratio (early bolting: late bolting)                                  | 15:2                      |                                   |
| X <sup>2</sup> for 3:1                                                           | 1.59 (ns)                 |                                   |
| X <sup>2</sup> for 15:1                                                          | 0.86 (ns)                 |                                   |
| Col-0; 35S::AtFLK; 6/1                                                           | 31                        | 13                                |
| Col-0; 35S::AtFLK; 6/2                                                           | 31                        | 15                                |
| Col-0; 35S::AtFLK; 6/3                                                           | 31                        | 15                                |
| Col-0; 35S::AtFLK; 6/4                                                           | 28                        | 15                                |
| Col-0; 35S::AtFLK; 6/5                                                           | 31                        | 15                                |

|                                                    |           |    |
|----------------------------------------------------|-----------|----|
| Col-0; 35S::AtFLK; 5/6                             | 25        | 13 |
| Col-0; 35S::AtFLK; 5/7                             | 25        | 15 |
| Col-0; 35S::AtFLK; 5/8                             | 28        | 14 |
| Col-0; 35S::AtFLK; 5/9                             | 28        | 14 |
| Col-0; 35S::AtFLK; 5/10 <sup>b</sup>               | 38        | 18 |
| Col-0; 35S::AtFLK; 5/11                            | 31        | 14 |
| Col-0; 35S::AtFLK; 5/12 <sup>b</sup>               | 39        | 18 |
| Col-0; 35S::AtFLK; 5/13 <sup>b</sup>               | 38        | 19 |
| Col-0; 35S::AtFLK; 5/14 <sup>b</sup>               | 40        | 21 |
| Col-0; 35S::AtFLK; 5/15                            | 28        | 16 |
| Col-0; 35S::AtFLK; 5/16                            | 25        | 14 |
| Col-0; 35S::AtFLK; 5/17                            | 31        | 20 |
| Segregation ratio (early bolting:<br>late bolting) | 13:4      |    |
| X <sup>2</sup> for 3:1                             | 0.02 (ns) |    |
| X <sup>2</sup> for 15:1                            | 8.56 **   |    |
| Col-0; 35S::AtFLK; 7/1                             | 31        | 18 |
| Col-0; 35S::AtFLK; 7/2                             | 28        | 14 |
| Col-0; 35S::AtFLK; 7/3                             | 28        | 16 |
| Col-0; 35S::AtFLK; 7/4                             | 28        | 14 |
| Col-0; 35S::AtFLK; 7/5                             | 35        | 13 |
| Col-0; 35S::AtFLK; 7/6                             | 31        | 14 |
| Col-0; 35S::AtFLK; 7/7                             | 28        | 13 |
| Col-0; 35S::AtFLK; 7/8                             | 28        | 11 |
| Col-0; 35S::AtFLK; 7/9                             | 25        | 11 |
| Col-0; 35S::AtFLK; 7/10                            | 28        | 13 |
| Col-0; 35S::AtFLK; 7/11                            | 31        | 10 |
| Col-0; 35S::AtFLK; 7/12                            | -         | -  |
| Col-0; 35S::AtFLK; 7/13                            | 28        | 15 |
| Col-0; 35S::AtFLK; 7/14                            | 31        | 18 |
| Col-0; 35S::AtFLK; 7/15                            | 28        | 15 |
| Col-0; 35S::AtFLK; 7/16                            | 28        | 13 |
| Col-0; 35S::AtFLK; 7/17                            | 31        | 17 |
| Segregation ratio (early bolting:<br>late bolting) | 15:1      |    |
| X <sup>2</sup> for 3:1                             | 3.00 (ns) |    |
| X <sup>2</sup> for 15:1                            | 0.00 (ns) |    |
| Col-0; 35S::AtFLK; 9/1                             | 28        | 17 |
| Col-0; 35S::AtFLK; 9/2                             | 28        | 19 |
| Col-0; 35S::AtFLK; 9/3                             | 31        | 17 |
| Col-0; 35S::AtFLK; 9/4                             | 25        | 15 |
| Col-0; 35S::AtFLK; 9/5                             | 28        | 17 |
| Col-0; 35S::AtFLK; 9/6                             | 25        | 15 |
| Col-0; 35S::AtFLK; 9/7                             | 28        | 15 |
| Col-0; 35S::AtFLK; 9/8                             | 25        | 17 |
| Col-0; 35S::AtFLK; 9/9                             | 31        | 17 |
| Col-0; 35S::AtFLK; 9/10                            | 28        | 15 |
| Col-0; 35S::AtFLK; 9/11                            | 35        | 16 |
| Col-0; 35S::AtFLK; 9/12                            | 35        | 15 |
| Col-0; 35S::AtFLK; 9/13                            | 28        | 20 |

|                                                    |           |    |
|----------------------------------------------------|-----------|----|
| Col-0; 35S::AtFLK; 6/6                             | 38        | 15 |
| Col-0; 35S::AtFLK; 6/7                             | 28        | 16 |
| Col-0; 35S::AtFLK; 6/8                             | 25        | 12 |
| Col-0; 35S::AtFLK; 6/9                             | 28        | 14 |
| Col-0; 35S::AtFLK; 6/10                            | 39        | 16 |
| Col-0; 35S::AtFLK; 6/11                            | 31        | 15 |
| Col-0; 35S::AtFLK; 6/12                            | 28        | 13 |
| Col-0; 35S::AtFLK; 6/13                            | 28        | 16 |
| Col-0; 35S::AtFLK; 6/14                            | 31        | 16 |
| Col-0; 35S::AtFLK; 6/15                            | 28        | 14 |
| Col-0; 35S::AtFLK; 6/16                            | 31        | 17 |
| Col-0; 35S::AtFLK; 6/17                            | 28        | 18 |
| Segregation ratio (early bolting:<br>late bolting) | 15:2      |    |
| X <sup>2</sup> for 3:1                             | 1.59 (ns) |    |
| X <sup>2</sup> for 15:1                            | 0.86 (ns) |    |
| Col-0; 35S::AtFLK; 8/1                             | 31        | 18 |
| Col-0; 35S::AtFLK; 8/2                             | 31        | 17 |
| Col-0; 35S::AtFLK; 8/3                             | 28        | 16 |
| Col-0; 35S::AtFLK; 8/4                             | 28        | 14 |
| Col-0; 35S::AtFLK; 8/5                             | 25        | 12 |
| Col-0; 35S::AtFLK; 8/6                             | 27        | 16 |
| Col-0; 35S::AtFLK; 8/7                             | 27        | 17 |
| Col-0; 35S::AtFLK; 8/8                             | 25        | 12 |
| Col-0; 35S::AtFLK; 8/9                             | 28        | 18 |
| Col-0; 35S::AtFLK; 8/10                            | 28        | 16 |
| Col-0; 35S::AtFLK; 8/11                            | 28        | 15 |
| Col-0; 35S::AtFLK; 8/12                            | 29        | 13 |
| Col-0; 35S::AtFLK; 8/13                            | 28        | 13 |
| Col-0; 35S::AtFLK; 8/14                            | 25        | 14 |
| Col-0; 35S::AtFLK; 8/15                            | 31        | 17 |
| Col-0; 35S::AtFLK; 8/16                            | 31        | 16 |
| Col-0; 35S::AtFLK; 8/17                            | 28        | 15 |
| Segregation ratio (early bolting:<br>late bolting) | 17:0      |    |
| X <sup>2</sup> for 3:1                             | 6.08 **   |    |
| X <sup>2</sup> for 15:1                            | 1.14 (ns) |    |

|                                                    |           |    |
|----------------------------------------------------|-----------|----|
| Col-0; 35S::AtFLK; 9/14                            | 25        | 15 |
| Col-0; 35S::AtFLK; 9/15                            | 25        | 15 |
| Col-0; 35S::AtFLK; 9/16                            | 28        | 16 |
| Col-0; 35S::AtFLK; 9/17                            | 28        | 21 |
| Segregation ratio (early bolting:<br>late bolting) | 15:2      |    |
| $\chi^2$ for 3:1                                   | 1.59 (ns) |    |
| $\chi^2$ for 15:1                                  | 0.86 (ns) |    |

| T2 plants (genetic background; transgene cassette; family number / plant number) | Number of days to bolting | Total number of leaves at bolting |
|----------------------------------------------------------------------------------|---------------------------|-----------------------------------|
| <i>flk-1</i> ; 35S::BvFLK; 1/1                                                   | 28                        | 13                                |
| <i>flk-1</i> ; 35S::BvFLK; 1/2                                                   | 28                        | 12                                |
| <i>flk-1</i> ; 35S::BvFLK; 1/3                                                   | 28                        | 16                                |
| <i>flk-1</i> ; 35S::BvFLK; 1/4                                                   | 28                        | 17                                |
| <i>flk-1</i> ; 35S::BvFLK; 1/5                                                   | 28                        | 14                                |
| <i>flk-1</i> ; 35S::BvFLK; 1/6                                                   | 28                        | 15                                |
| <i>flk-1</i> ; 35S::BvFLK; 1/7                                                   | 28                        | 20                                |
| <i>flk-1</i> ; 35S::BvFLK; 1/8                                                   | 25                        | 15                                |
| <i>flk-1</i> ; 35S::BvFLK; 1/9                                                   | 28                        | 15                                |
| <i>flk-1</i> ; 35S::BvFLK; 1/10                                                  | 28                        | 15                                |
| <i>flk-1</i> ; 35S::BvFLK; 1/11                                                  | 38                        | 15                                |
| <i>flk-1</i> ; 35S::BvFLK; 1/12                                                  | 25                        | 14                                |
| <i>flk-1</i> ; 35S::BvFLK; 1/13                                                  | 28                        | 15                                |
| <i>flk-1</i> ; 35S::BvFLK; 1/14                                                  | 25                        | 14                                |
| <i>flk-1</i> ; 35S::BvFLK; 1/15                                                  | 28                        | 17                                |
| <i>flk-1</i> ; 35S::BvFLK; 1/16                                                  | 28                        | 14                                |
| <i>flk-1</i> ; 35S::BvFLK; 1/17                                                  | 28                        | 18                                |
| Segregation ratio (early bolting: late bolting)                                  | 17:0                      |                                   |
| $\chi^2$ for 3:1                                                                 | 6.08 **                   |                                   |
| $\chi^2$ for 15:1                                                                | 1.14 (ns)                 |                                   |
| <i>flk-1</i> ; 35S::BvFLK; 5/1                                                   | 28                        | 19                                |
| <i>flk-1</i> ; 35S::BvFLK; 5/2                                                   | 28                        | 13                                |
| <i>flk-1</i> ; 35S::BvFLK; 5/3                                                   | 28                        | 14                                |
| <i>flk-1</i> ; 35S::BvFLK; 5/4                                                   | 28                        | 17                                |
| <i>flk-1</i> ; 35S::BvFLK; 5/5                                                   | 28                        | 17                                |
| <i>flk-1</i> ; 35S::BvFLK; 5/6                                                   | 28                        | 15                                |
| <i>flk-1</i> ; 35S::BvFLK; 5/7                                                   | 28                        | 18                                |
| <i>flk-1</i> ; 35S::BvFLK; 5/8                                                   | 28                        | 17                                |
| <i>flk-1</i> ; 35S::BvFLK; 5/9                                                   | 31                        | 16                                |
| <i>flk-1</i> ; 35S::BvFLK; 5/10                                                  | 28                        | 17                                |
| <i>flk-1</i> ; 35S::BvFLK; 5/11                                                  | 35                        | 13                                |
| <i>flk-1</i> ; 35S::BvFLK; 5/12                                                  | 25                        | 18                                |
| <i>flk-1</i> ; 35S::BvFLK; 5/13                                                  | 28                        | 16                                |
| <i>flk-1</i> ; 35S::BvFLK; 5/14                                                  | 31                        | 15                                |
| <i>flk-1</i> ; 35S::BvFLK; 5/15                                                  | 25                        | 20                                |
| <i>flk-1</i> ; 35S::BvFLK; 5/16                                                  | 25                        | 18                                |
| <i>flk-1</i> ; 35S::BvFLK; 5/17                                                  | 28                        | 19                                |
| Segregation ratio (early bolting: late bolting)                                  | 17:0                      |                                   |
| $\chi^2$ for 3:1                                                                 | 6.08 **                   |                                   |
| $\chi^2$ for 15:1                                                                | 1.14 (ns)                 |                                   |
| <i>flk-1</i> ; 35S::BvFLK; 9/1                                                   | 31                        | 15                                |
| <i>flk-1</i> ; 35S::BvFLK; 9/2                                                   | 28                        | 16                                |
| <i>flk-1</i> ; 35S::BvFLK; 9/3                                                   | 28                        | 16                                |
| <i>flk-1</i> ; 35S::BvFLK; 9/4                                                   | 28                        | 12                                |
| <i>flk-1</i> ; 35S::BvFLK; 9/5                                                   | 24                        | 13                                |

| T2 plants (genetic background; transgene cassette; family number / plant number) | Number of days to bolting | Total number of leaves at bolting |
|----------------------------------------------------------------------------------|---------------------------|-----------------------------------|
| <i>flk-1</i> ; 35S::BvFLK; 2/1                                                   | 31                        | 18                                |
| <i>flk-1</i> ; 35S::BvFLK; 2/2                                                   | 31                        | 17                                |
| <i>flk-1</i> ; 35S::BvFLK; 2/3                                                   | 28                        | 18                                |
| <i>flk-1</i> ; 35S::BvFLK; 2/4                                                   | -                         | -                                 |
| <i>flk-1</i> ; 35S::BvFLK; 2/5                                                   | 28                        | 20                                |
| <i>flk-1</i> ; 35S::BvFLK; 2/6                                                   | 25                        | 16                                |
| <i>flk-1</i> ; 35S::BvFLK; 2/7                                                   | 28                        | 17                                |
| <i>flk-1</i> ; 35S::BvFLK; 2/8                                                   | 25                        | 21                                |
| <i>flk-1</i> ; 35S::BvFLK; 2/9                                                   | 25                        | 18                                |
| <i>flk-1</i> ; 35S::BvFLK; 2/10                                                  | 28                        | 15                                |
| <i>flk-1</i> ; 35S::BvFLK; 2/11                                                  | 31                        | 14                                |
| <i>flk-1</i> ; 35S::BvFLK; 2/12                                                  | 31                        | 16                                |
| <i>flk-1</i> ; 35S::BvFLK; 2/13                                                  | 28                        | 14                                |
| <i>flk-1</i> ; 35S::BvFLK; 2/14                                                  | 25                        | 13                                |
| <i>flk-1</i> ; 35S::BvFLK; 2/15                                                  | 31                        | 17                                |
| <i>flk-1</i> ; 35S::BvFLK; 2/16                                                  | 28                        | 15                                |
| <i>flk-1</i> ; 35S::BvFLK; 2/17                                                  | 28                        | 16                                |
| Segregation ratio (early bolting: late bolting)                                  | 16:0                      |                                   |
| $\chi^2$ for 3:1                                                                 | 5.33 **                   |                                   |
| $\chi^2$ for 15:1                                                                | 1.07 (ns)                 |                                   |
| <i>flk-1</i> ; 35S::BvFLK; 7/1                                                   | 35                        | 11                                |
| <i>flk-1</i> ; 35S::BvFLK; 7/2                                                   | 35                        | 16                                |
| <i>flk-1</i> ; 35S::BvFLK; 7/3                                                   | 35                        | 14                                |
| <i>flk-1</i> ; 35S::BvFLK; 7/4                                                   | 35                        | 14                                |
| <i>flk-1</i> ; 35S::BvFLK; 7/5                                                   | 31                        | 11                                |
| <i>flk-1</i> ; 35S::BvFLK; 7/6                                                   | 28                        | 17                                |
| <i>flk-1</i> ; 35S::BvFLK; 7/7                                                   | 31                        | 17                                |
| <i>flk-1</i> ; 35S::BvFLK; 7/8                                                   | 31                        | 18                                |
| <i>flk-1</i> ; 35S::BvFLK; 7/9                                                   | 28                        | 15                                |
| <i>flk-1</i> ; 35S::BvFLK; 7/10                                                  | 28                        | 16                                |
| <i>flk-1</i> ; 35S::BvFLK; 7/11                                                  | 38                        | 16                                |
| <i>flk-1</i> ; 35S::BvFLK; 7/12                                                  | 31                        | 19                                |
| <i>flk-1</i> ; 35S::BvFLK; 7/13                                                  | 31                        | 17                                |
| <i>flk-1</i> ; 35S::BvFLK; 7/14                                                  | 31                        | 20                                |
| <i>flk-1</i> ; 35S::BvFLK; 7/15                                                  | 28                        | 14                                |
| <i>flk-1</i> ; 35S::BvFLK; 7/16                                                  | 28                        | 17                                |
| <i>flk-1</i> ; 35S::BvFLK; 7/17                                                  | 28                        | 18                                |
| Segregation ratio (early bolting: late bolting)                                  | 17:0                      |                                   |
| $\chi^2$ for 3:1                                                                 | 6.08 **                   |                                   |
| $\chi^2$ for 15:1                                                                | 1.14 (ns)                 |                                   |
| <i>flk-1</i> ; 35S::BvFLK; 10/1                                                  | 28                        | 16                                |
| <i>flk-1</i> ; 35S::BvFLK; 10/2                                                  | 28                        | 17                                |
| <i>flk-1</i> ; 35S::BvFLK; 10/3                                                  | 28                        | 15                                |
| <i>flk-1</i> ; 35S::BvFLK; 10/4                                                  | 28                        | 16                                |
| <i>flk-1</i> ; 35S::BvFLK; 10/5                                                  | 28                        | 17                                |

|                                                    |           |     |
|----------------------------------------------------|-----------|-----|
| <i>flk-1</i> ; 35S::BvFLK; 9/6                     | 28        | 18  |
| <i>flk-1</i> ; 35S::BvFLK; 9/7                     | 28        | 18  |
| <i>flk-1</i> ; 35S::BvFLK; 9/8                     | 24        | 116 |
| <i>flk-1</i> ; 35S::BvFLK; 9/9                     | 24        | 16  |
| <i>flk-1</i> ; 35S::BvFLK; 9/10                    | 28        | 17  |
| <i>flk-1</i> ; 35S::BvFLK; 9/11                    | 28        | 17  |
| <i>flk-1</i> ; 35S::BvFLK; 9/12                    | 25        | 16  |
| <i>flk-1</i> ; 35S::BvFLK; 9/13                    | 28        | 19  |
| <i>flk-1</i> ; 35S::BvFLK; 9/14                    | 24        | 17  |
| <i>flk-1</i> ; 35S::BvFLK; 9/15                    | 28        | 15  |
| <i>flk-1</i> ; 35S::BvFLK; 9/16                    | 28        | 18  |
| <i>flk-1</i> ; 35S::BvFLK; 9/17                    | 28        | 16  |
| Segregation ratio (early bolting:<br>late bolting) | 17:0      |     |
| X <sup>2</sup> for 3:1                             | 6.08 **   |     |
| X <sup>2</sup> for 15:1                            | 1.14 (ns) |     |
| <i>flk-1</i> ; 35S::BvFLK; 11/1                    | 25        | 17  |
| <i>flk-1</i> ; 35S::BvFLK; 11/2                    | 25        | 17  |
| <i>flk-1</i> ; 35S::BvFLK; 11/3                    | 28        | 17  |
| <i>flk-1</i> ; 35S::BvFLK; 11/4                    | 28        | 15  |
| <i>flk-1</i> ; 35S::BvFLK; 11/5                    | 28        | 18  |
| <i>flk-1</i> ; 35S::BvFLK; 11/6                    | 25        | 13  |
| <i>flk-1</i> ; 35S::BvFLK; 11/7                    | 28        | 17  |
| <i>flk-1</i> ; 35S::BvFLK; 11/8                    | 28        | 13  |
| <i>flk-1</i> ; 35S::BvFLK; 11/9                    | 28        | 17  |
| <i>flk-1</i> ; 35S::BvFLK; 11/10                   | 35        | 20  |
| <i>flk-1</i> ; 35S::BvFLK; 11/11                   | 28        | 17  |
| <i>flk-1</i> ; 35S::BvFLK; 11/12                   | 25        | 17  |
| <i>flk-1</i> ; 35S::BvFLK; 11/13                   | 28        | 18  |
| <i>flk-1</i> ; 35S::BvFLK; 11/14                   | 28        | 19  |
| <i>flk-1</i> ; 35S::BvFLK; 11/15                   | 225       | 17  |
| <i>flk-1</i> ; 35S::BvFLK; 11/16                   | 35        | 18  |
| <i>flk-1</i> ; 35S::BvFLK; 11/17                   | 28        | 17  |
| Segregation ratio (early bolting:<br>late bolting) | 17: 0     |     |
| X <sup>2</sup> for 3:1                             | 6.08 **   |     |
| X <sup>2</sup> for 15:1                            | 1.14 (ns) |     |
| <i>flk-1</i> ; 35S::BvFLK; 14/1                    | 31        | 19  |
| <i>flk-1</i> ; 35S::BvFLK; 14/2                    | 28        | 17  |
| <i>flk-1</i> ; 35S::BvFLK; 14/3                    | 31        | 17  |
| <i>flk-1</i> ; 35S::BvFLK; 14/4                    | 31        | 19  |
| <i>flk-1</i> ; 35S::BvFLK; 14/5                    | 28        | 16  |
| <i>flk-1</i> ; 35S::BvFLK; 14/6                    | 28        | 17  |
| <i>flk-1</i> ; 35S::BvFLK; 14/7                    | 35        | 18  |
| <i>flk-1</i> ; 35S::BvFLK; 14/8                    | 31        | 17  |
| <i>flk-1</i> ; 35S::BvFLK; 14/9                    | 35        | 16  |
| <i>flk-1</i> ; 35S::BvFLK; 14/10                   | 28        | 18  |
| <i>flk-1</i> ; 35S::BvFLK; 14/11                   | 28        | 17  |
| <i>flk-1</i> ; 35S::BvFLK; 14/12                   | 35        | 17  |
| <i>flk-1</i> ; 35S::BvFLK; 14/13                   | 35        | 17  |

|                                                    |           |           |
|----------------------------------------------------|-----------|-----------|
| <i>flk-1</i> ; 35S::BvFLK; 10/6                    | 28        | 15        |
| <i>flk-1</i> ; 35S::BvFLK; 10/7                    | 28        | 20        |
| <i>flk-1</i> ; 35S::BvFLK; 10/8                    | 28        | 16        |
| <i>flk-1</i> ; 35S::BvFLK; 10/9                    | 28        | 15        |
| <i>flk-1</i> ; 35S::BvFLK; 10/10                   | 25        | 16        |
| <i>flk-1</i> ; 35S::BvFLK; 10/11                   | 25        | 17        |
| <i>flk-1</i> ; 35S::BvFLK; 10/12                   | 28        | 14        |
| <i>flk-1</i> ; 35S::BvFLK; 10/13                   | 28        | 18        |
| <i>flk-1</i> ; 35S::BvFLK; 10/14                   | 25        | 16        |
| <i>flk-1</i> ; 35S::BvFLK; 10/15                   | 28        | 21        |
| <i>flk-1</i> ; 35S::BvFLK; 10/16                   | 28        | 18        |
| <i>flk-1</i> ; 35S::BvFLK; 10/17                   | 25        | 17        |
| Segregation ratio (early bolting:<br>late bolting) | 17:0      |           |
| X <sup>2</sup> for 3:1                             | 6.08 **   |           |
| X <sup>2</sup> for 15:1                            | 1.14 (ns) |           |
| <i>flk-1</i> ; 35S::BvFLK; 12/1                    | 28        | 16        |
| <i>flk-1</i> ; 35S::BvFLK; 12/2                    | 28        | 18        |
| <i>flk-1</i> ; 35S::BvFLK; 12/3                    | 31        | 15        |
| <i>flk-1</i> ; 35S::BvFLK; 12/4                    | 28        | 14        |
| <i>flk-1</i> ; 35S::BvFLK; 12/5                    | 28        | 18        |
| <i>flk-1</i> ; 35S::BvFLK; 12/6                    | 28        | 13        |
| <i>flk-1</i> ; 35S::BvFLK; 12/7                    | 35        | 18        |
| <i>flk-1</i> ; 35S::BvFLK; 12/8                    | 28        | 16        |
| <i>flk-1</i> ; 35S::BvFLK; 12/9                    | 28        | 19        |
| <i>flk-1</i> ; 35S::BvFLK; 12/10                   | 28        | 17        |
| <i>flk-1</i> ; 35S::BvFLK; 12/11                   | 28        | 17        |
| <i>flk-1</i> ; 35S::BvFLK; 12/12                   | 28        | 15        |
| <i>flk-1</i> ; 35S::BvFLK; 12/13                   | 28        | 16        |
| <i>flk-1</i> ; 35S::BvFLK; 12/14                   | 31        | 12        |
| <i>flk-1</i> ; 35S::BvFLK; 12/15                   | 28        | 16        |
| <i>flk-1</i> ; 35S::BvFLK; 12/16                   | 38        | 15        |
| <i>flk-1</i> ; 35S::BvFLK; 12/17                   | 28        | 16        |
| Segregation ratio (early bolting:<br>late bolting) | 17: 0     |           |
| X <sup>2</sup> for 3:1                             | 6.08 **   |           |
| X <sup>2</sup> for 15:1                            | 1.14 (ns) |           |
| <b><i>flk-1</i>; 35S::BvFLK; 18/1</b>              | <b>28</b> | <b>18</b> |
| <b><i>flk-1</i>; 35S::BvFLK; 18/2</b>              | <b>35</b> | <b>17</b> |
| <b><i>flk-1</i>; 35S::BvFLK; 18/3</b>              | <b>35</b> | <b>17</b> |
| <b><i>flk-1</i>; 35S::BvFLK; 18/4</b>              | <b>35</b> | <b>16</b> |
| <b><i>flk-1</i>; 35S::BvFLK; 18/5</b>              | <b>35</b> | <b>15</b> |
| <b><i>flk-1</i>; 35S::BvFLK; 18/6</b>              | <b>35</b> | <b>16</b> |
| <b><i>flk-1</i>; 35S::BvFLK; 18/7</b>              | <b>38</b> | <b>15</b> |
| <b><i>flk-1</i>; 35S::BvFLK; 18/8</b>              | <b>38</b> | <b>16</b> |
| <b><i>flk-1</i>; 35S::BvFLK; 18/9</b>              | <b>28</b> | <b>17</b> |
| <b><i>flk-1</i>; 35S::BvFLK; 18/10</b>             | <b>35</b> | <b>18</b> |
| <b><i>flk-1</i>; 35S::BvFLK; 18/11<sup>b</sup></b> | <b>69</b> | <b>71</b> |
| <b><i>flk-1</i>; 35S::BvFLK; 18/12</b>             | <b>31</b> | <b>12</b> |
| <b><i>flk-1</i>; 35S::BvFLK; 18/13</b>             | <b>35</b> | <b>18</b> |

|                                                    |           |    |
|----------------------------------------------------|-----------|----|
| <i>flk-1; 35S::BvFLK; 14/14</i>                    | 35        | 15 |
| <i>flk-1; 35S::BvFLK; 14/15</i>                    | 28        | 17 |
| <i>flk-1; 35S::BvFLK; 14/16</i>                    | 31        | 15 |
| <i>flk-1; 35S::BvFLK; 14/17</i>                    | 31        | 14 |
| Segregation ratio (early bolting:<br>late bolting) | 17: 0     |    |
| $\chi^2$ for 3:1                                   | 6.08 **   |    |
| $\chi^2$ for 15:1                                  | 1.14 (ns) |    |

|                                                    |           |           |
|----------------------------------------------------|-----------|-----------|
| <b><i>flk-1; 35S::BvFLK; 18/14</i></b>             | <b>35</b> | <b>15</b> |
| <b><i>flk-1; 35S::BvFLK; 18/15</i></b>             | <b>35</b> | <b>18</b> |
| <b><i>flk-1; 35S::BvFLK; 18/16<sup>b</sup></i></b> | <b>66</b> | <b>65</b> |
| <b><i>flk-1; 35S::BvFLK; 18/17</i></b>             | <b>-</b>  | <b>-</b>  |
| Segregation ratio (early bolting:<br>late bolting) | 14:2      |           |
| $\chi^2$ for 3:1                                   | 1.33 (ns) |           |
| $\chi^2$ for 15:1                                  | 1.07 (ns) |           |

| T2 plants (genetic background; transgene cassette; family number / plant number) | Number of days to bolting | Total number of leaves at bolting |
|----------------------------------------------------------------------------------|---------------------------|-----------------------------------|
| <i>flk-1; endo::BvFLK; 1/1</i>                                                   | 28                        | 23                                |
| <i>flk-1; endo::BvFLK; 1/2</i>                                                   | 28                        | 13                                |
| <i>flk-1; endo::BvFLK; 1/3</i>                                                   | 35                        | 18                                |
| <i>flk-1; endo::BvFLK; 1/4</i>                                                   | 28                        | 18                                |
| <i>flk-1; endo::BvFLK; 1/5</i>                                                   | 31                        | 13                                |
| <i>flk-1; endo::BvFLK; 1/6</i>                                                   | 31                        | 15                                |
| <i>flk-1; endo::BvFLK; 1/7</i>                                                   | 31                        | 13                                |
| <i>flk-1; endo::BvFLK; 1/8</i>                                                   | 28                        | 19                                |
| <i>flk-1; endo::BvFLK; 1/9</i>                                                   | 28                        | 15                                |
| <i>flk-1; endo::BvFLK; 1/10</i>                                                  | 31                        | 14                                |
| <i>flk-1; endo::BvFLK; 1/11</i>                                                  | 31                        | 15                                |
| <i>flk-1; endo::BvFLK; 1/12</i>                                                  | 31                        | 15                                |
| <i>flk-1; endo::BvFLK; 1/13</i>                                                  | 35                        | 17                                |
| <i>flk-1; endo::BvFLK; 1/14</i>                                                  | 28                        | 16                                |
| <i>flk-1; endo::BvFLK; 1/15</i>                                                  | 28                        | 15                                |
| <i>flk-1; endo::BvFLK; 1/16</i>                                                  | 28                        | 17                                |
| <i>flk-1; endo::BvFLK; 1/17</i>                                                  | 35                        | 17                                |
| Segregation ratio (early bolting: late bolting)                                  | 17:0                      |                                   |
| X <sup>2</sup> for 3:1                                                           | 6.08 **                   |                                   |
| X <sup>2</sup> for 15:1                                                          | 1.14 (ns)                 |                                   |
| <i>flk-1; endo::BvFLK; 3/1</i>                                                   | 28                        | 19                                |
| <i>flk-1; endo::BvFLK; 3/2</i>                                                   | 35                        | 16                                |
| <i>flk-1; endo::BvFLK; 3/3</i>                                                   | 31                        | 14                                |
| <i>flk-1; endo::BvFLK; 3/4</i>                                                   | 35                        | 14                                |
| <i>flk-1; endo::BvFLK; 3/5</i>                                                   | 35                        | 15                                |
| <i>flk-1; endo::BvFLK; 3/6</i>                                                   | 35                        | 16                                |
| <i>flk-1; endo::BvFLK; 3/7</i>                                                   | 31                        | 14                                |
| <i>flk-1; endo::BvFLK; 3/8</i>                                                   | 38                        | 16                                |
| <i>flk-1; endo::BvFLK; 3/9</i>                                                   | 31                        | 16                                |
| <i>flk-1; endo::BvFLK; 3/10</i>                                                  | 28                        | 14                                |
| <i>flk-1; endo::BvFLK; 3/11</i>                                                  | 28                        | 12                                |
| <i>flk-1; endo::BvFLK; 3/12</i>                                                  | 31                        | 17                                |
| <i>flk-1; endo::BvFLK; 3/13</i>                                                  | -                         | -                                 |
| <i>flk-1; endo::BvFLK; 3/14</i>                                                  | 28                        | 18                                |
| <i>flk-1; endo::BvFLK; 3/15</i>                                                  | 28                        | 16                                |
| <i>flk-1; endo::BvFLK; 3/16</i>                                                  | 28                        | 13                                |
| <i>flk-1; endo::BvFLK; 3/17</i>                                                  | 31                        | 13                                |
| Segregation ratio (early bolting: late bolting)                                  | 16:0                      |                                   |
| X <sup>2</sup> for 3:1                                                           | 5.33 **                   |                                   |
| X <sup>2</sup> for 15:1                                                          | 1.07 (ns)                 |                                   |
| <b><i>flk-1; endo::BvFLK; 5/1</i></b>                                            | <b>35</b>                 | <b>13</b>                         |
| <b><i>flk-1; endo::BvFLK; 5/2</i></b>                                            | <b>35</b>                 | <b>15</b>                         |
| <b><i>flk-1; endo::BvFLK; 5/3</i></b>                                            | <b>35</b>                 | <b>15</b>                         |
| <b><i>flk-1; endo::BvFLK; 5/4</i></b>                                            | <b>31</b>                 | <b>17</b>                         |
| <b><i>flk-1; endo::BvFLK; 5/5</i></b>                                            | <b>28</b>                 | <b>15</b>                         |

| T2 plants (genetic background; transgene cassette; family number / plant number) | Number of days to bolting | Total number of leaves at bolting |
|----------------------------------------------------------------------------------|---------------------------|-----------------------------------|
| <i>flk-1; endo::BvFLK; 2/1</i>                                                   | 31                        | 17                                |
| <i>flk-1; endo::BvFLK; 2/2</i>                                                   | 31                        | 15                                |
| <i>flk-1; endo::BvFLK; 2/3</i>                                                   | -                         | -                                 |
| <i>flk-1; endo::BvFLK; 2/4</i>                                                   | 31                        | 14                                |
| <i>flk-1; endo::BvFLK; 2/5</i>                                                   | 35                        | 13                                |
| <i>flk-1; endo::BvFLK; 2/6</i>                                                   | 31                        | 17                                |
| <i>flk-1; endo::BvFLK; 2/7</i>                                                   | 35                        | 16                                |
| <i>flk-1; endo::BvFLK; 2/8</i>                                                   | 31                        | 15                                |
| <i>flk-1; endo::BvFLK; 2/9</i>                                                   | 35                        | 28                                |
| <i>flk-1; endo::BvFLK; 2/10</i>                                                  | 31                        | 14                                |
| <i>flk-1; endo::BvFLK; 2/11</i>                                                  | 38                        | 12                                |
| <i>flk-1; endo::BvFLK; 2/12</i>                                                  | 35                        | 16                                |
| <i>flk-1; endo::BvFLK; 2/13</i>                                                  | 31                        | 15                                |
| <i>flk-1; endo::BvFLK; 2/14</i>                                                  | 31                        | 16                                |
| <i>flk-1; endo::BvFLK; 2/15</i>                                                  | 28                        | 15                                |
| <i>flk-1; endo::BvFLK; 2/16</i>                                                  | 31                        | 15                                |
| <i>flk-1; endo::BvFLK; 2/17</i>                                                  | 31                        | 14                                |
| Segregation ratio (early bolting: late bolting)                                  | 16:0                      |                                   |
| X <sup>2</sup> for 3:1                                                           | 5.33 **                   |                                   |
| X <sup>2</sup> for 15:1                                                          | 1.07 (ns)                 |                                   |
| <i>flk-1; endo::BvFLK; 4/1</i>                                                   | 28                        | 18                                |
| <i>flk-1; endo::BvFLK; 4/2</i>                                                   | 28                        | 15                                |
| <i>flk-1; endo::BvFLK; 4/3</i>                                                   | 28                        | 13                                |
| <i>flk-1; endo::BvFLK; 4/4</i>                                                   | 28                        | 16                                |
| <i>flk-1; endo::BvFLK; 4/5</i>                                                   | 31                        | 17                                |
| <i>flk-1; endo::BvFLK; 4/6</i>                                                   | 31                        | 19                                |
| <i>flk-1; endo::BvFLK; 4/7</i>                                                   | 28                        | 15                                |
| <i>flk-1; endo::BvFLK; 4/8</i>                                                   | 28                        | 15                                |
| <i>flk-1; endo::BvFLK; 4/9</i>                                                   | 25                        | 14                                |
| <i>flk-1; endo::BvFLK; 4/10</i>                                                  | 28                        | 16                                |
| <i>flk-1; endo::BvFLK; 4/11</i>                                                  | 25                        | 18                                |
| <i>flk-1; endo::BvFLK; 4/12</i>                                                  | 28                        | 17                                |
| <i>flk-1; endo::BvFLK; 4/13</i>                                                  | 38                        | 15                                |
| <i>flk-1; endo::BvFLK; 4/14</i>                                                  | 28                        | 15                                |
| <i>flk-1; endo::BvFLK; 4/15</i>                                                  | 28                        | 16                                |
| <i>flk-1; endo::BvFLK; 4/16</i>                                                  | 28                        | 14                                |
| <i>flk-1; endo::BvFLK; 4/17</i>                                                  | 28                        | 17                                |
| Segregation ratio (early bolting: late bolting)                                  | 17:0                      |                                   |
| X <sup>2</sup> for 3:1                                                           | 6.08 **                   |                                   |
| X <sup>2</sup> for 15:1                                                          | 1.14 (ns)                 |                                   |
| <i>flk-1; endo::BvFLK; 6/1</i>                                                   | 28                        | 14                                |
| <i>flk-1; endo::BvFLK; 6/2</i>                                                   | 39                        | 15                                |
| <i>flk-1; endo::BvFLK; 6/3</i>                                                   | 38                        | 15                                |
| <i>flk-1; endo::BvFLK; 6/4</i>                                                   | 38                        | 16                                |
| <i>flk-1; endo::BvFLK; 6/5</i>                                                   | 28                        | 16                                |

|                                                    |           |    |
|----------------------------------------------------|-----------|----|
| <i>flk-1; endo::BvFLK; 5/6</i>                     | 38        | 14 |
| <i>flk-1; endo::BvFLK; 5/7</i>                     | 35        | 15 |
| <i>flk-1; endo::BvFLK; 5/8<sup>b</sup></i>         | 71        | 64 |
| <i>flk-1; endo::BvFLK; 5/9</i>                     | 35        | 21 |
| <i>flk-1; endo::BvFLK; 5/10</i>                    | 28        | 13 |
| <i>flk-1; endo::BvFLK; 5/11<sup>b</sup></i>        | 67        | 69 |
| <i>flk-1; endo::BvFLK; 5/12</i>                    | 38        | 18 |
| <i>flk-1; endo::BvFLK; 5/13<sup>b</sup></i>        | 69        | 68 |
| <i>flk-1; endo::BvFLK; 5/14</i>                    | 28        | 14 |
| <i>flk-1; endo::BvFLK; 5/15<sup>b</sup></i>        | 67        | 66 |
| <i>flk-1; endo::BvFLK; 5/16</i>                    | 31        | 19 |
| <i>flk-1; endo::BvFLK; 5/17</i>                    | 31        | 17 |
| Segregation ratio (early bolting:<br>late bolting) | 13:4      |    |
| X <sup>2</sup> for 3:1                             | 0.02 (ns) |    |
| X <sup>2</sup> for 15:1                            | 8.56 **   |    |
| <i>flk-1; endo::BvFLK; 7/1</i>                     | 31        | 14 |
| <i>flk-1; endo::BvFLK; 7/2</i>                     | 28        | 17 |
| <i>flk-1; endo::BvFLK; 7/3</i>                     | 28        | 20 |
| <i>flk-1; endo::BvFLK; 7/4</i>                     | 28        | 20 |
| <i>flk-1; endo::BvFLK; 7/5</i>                     | 28        | 18 |
| <i>flk-1; endo::BvFLK; 7/6</i>                     | 28        | 17 |
| <i>flk-1; endo::BvFLK; 7/7</i>                     | 28        | 16 |
| <i>flk-1; endo::BvFLK; 7/8</i>                     | 28        | 21 |
| <i>flk-1; endo::BvFLK; 7/9</i>                     | 28        | 16 |
| <i>flk-1; endo::BvFLK; 7/10</i>                    | 28        | 16 |
| <i>flk-1; endo::BvFLK; 7/11</i>                    | 28        | 17 |
| <i>flk-1; endo::BvFLK; 7/12</i>                    | 28        | 15 |
| <i>flk-1; endo::BvFLK; 7/13</i>                    | 28        | 15 |
| <i>flk-1; endo::BvFLK; 7/14</i>                    | 28        | 18 |
| <i>flk-1; endo::BvFLK; 7/15</i>                    | 28        | 16 |
| <i>flk-1; endo::BvFLK; 7/16</i>                    | 31        | 19 |
| <i>flk-1; endo::BvFLK; 7/17</i>                    | 35        | 20 |
| Segregation ratio (early bolting:<br>late bolting) | 17: 0     |    |
| X <sup>2</sup> for 3:1                             | 6.08 **   |    |
| X <sup>2</sup> for 15:1                            | 1.14 (ns) |    |
| <i>flk-1; endo::BvFLK; 9/1</i>                     | 35        | 17 |
| <i>flk-1; endo::BvFLK; 9/2</i>                     | 28        | 15 |
| <i>flk-1; endo::BvFLK; 9/3</i>                     | 38        | 16 |
| <i>flk-1; endo::BvFLK; 9/4</i>                     | 31        | 16 |
| <i>flk-1; endo::BvFLK; 9/5</i>                     | 38        | 17 |
| <i>flk-1; endo::BvFLK; 9/6</i>                     | 28        | 15 |
| <i>flk-1; endo::BvFLK; 9/7</i>                     | 38        | 13 |
| <i>flk-1; endo::BvFLK; 9/8</i>                     | 31        | 19 |
| <i>flk-1; endo::BvFLK; 9/9</i>                     | 28        | 11 |
| <i>flk-1; endo::BvFLK; 9/10</i>                    | 28        | 10 |
| <i>flk-1; endo::BvFLK; 9/11</i>                    | 28        | 12 |
| <i>flk-1; endo::BvFLK; 9/12</i>                    | 28        | 12 |
| <i>flk-1; endo::BvFLK; 9/13</i>                    | 28        | 16 |

|                                                    |           |    |
|----------------------------------------------------|-----------|----|
| <i>flk-1; endo::BvFLK; 6/6</i>                     | 38        | 11 |
| <i>flk-1; endo::BvFLK; 6/7</i>                     | 31        | 15 |
| <i>flk-1; endo::BvFLK; 6/8</i>                     | 38        | 15 |
| <i>flk-1; endo::BvFLK; 6/9</i>                     | 39        | 15 |
| <i>flk-1; endo::BvFLK; 6/10</i>                    | 38        | 14 |
| <i>flk-1; endo::BvFLK; 6/11</i>                    | 35        | 16 |
| <i>flk-1; endo::BvFLK; 6/12</i>                    | 31        | 11 |
| <i>flk-1; endo::BvFLK; 6/13</i>                    | 31        | 15 |
| <i>flk-1; endo::BvFLK; 6/14</i>                    | 35        | 15 |
| <i>flk-1; endo::BvFLK; 6/15</i>                    | 38        | 17 |
| <i>flk-1; endo::BvFLK; 6/16</i>                    | 31        | 15 |
| <i>flk-1; endo::BvFLK; 6/17</i>                    | 31        | 16 |
| Segregation ratio (early bolting:<br>late bolting) | 17:0      |    |
| X <sup>2</sup> for 3:1                             | 6.08 **   |    |
| X <sup>2</sup> for 15:1                            | 1.14 (ns) |    |
| <i>flk-1; endo::BvFLK; 8/1</i>                     | 38        | 18 |
| <i>flk-1; endo::BvFLK; 8/2</i>                     | 28        | 14 |
| <i>flk-1; endo::BvFLK; 8/3</i>                     | 31        | 15 |
| <i>flk-1; endo::BvFLK; 8/4</i>                     | 31        | 17 |
| <i>flk-1; endo::BvFLK; 8/5</i>                     | 31        | 15 |
| <i>flk-1; endo::BvFLK; 8/6</i>                     | 31        | 16 |
| <i>flk-1; endo::BvFLK; 8/7</i>                     | 28        | 15 |
| <i>flk-1; endo::BvFLK; 8/8</i>                     | 31        | 19 |
| <i>flk-1; endo::BvFLK; 8/9</i>                     | 31        | 15 |
| <i>flk-1; endo::BvFLK; 8/10</i>                    | 38        | 18 |
| <i>flk-1; endo::BvFLK; 8/11</i>                    | 31        | 17 |
| <i>flk-1; endo::BvFLK; 8/12</i>                    | 28        | 11 |
| <i>flk-1; endo::BvFLK; 8/13</i>                    | 38        | 14 |
| <i>flk-1; endo::BvFLK; 8/14</i>                    | 31        | 16 |
| <i>flk-1; endo::BvFLK; 8/15</i>                    | 28        | 13 |
| <i>flk-1; endo::BvFLK; 8/16</i>                    | 28        | 14 |
| <i>flk-1; endo::BvFLK; 8/17</i>                    | 28        | 16 |
| Segregation ratio (early bolting:<br>late bolting) | 17: 0     |    |
| X <sup>2</sup> for 3:1                             | 6.08 **   |    |
| X <sup>2</sup> for 15:1                            | 1.14 (ns) |    |



|                                                    |           |    |
|----------------------------------------------------|-----------|----|
| <i>flk-1; endo::BvFLK; 9/14</i>                    | 28        | 19 |
| <i>flk-1; endo::BvFLK; 9/15</i>                    | 28        | 13 |
| <i>flk-1; endo::BvFLK; 9/16</i>                    | 31        | 14 |
| <i>flk-1; endo::BvFLK; 9/17</i>                    | 28        | 20 |
| Segregation ratio (early bolting:<br>late bolting) | 17: 0     |    |
| $\chi^2$ for 3:1                                   | 6.08 **   |    |
| $\chi^2$ for 15:1                                  | 1.14 (ns) |    |

| T2 plants (genetic background; transgene cassette; family number / plant number) | Number of days to bolting | Total number of leaves at bolting |
|----------------------------------------------------------------------------------|---------------------------|-----------------------------------|
| <i>flk-1; 35S::AtFLK; 1/1</i>                                                    | 28                        | 18                                |
| <i>flk-1; 35S::AtFLK; 1/2</i>                                                    | 28                        | 15                                |
| <i>flk-1; 35S::AtFLK; 1/3</i>                                                    | 28                        | 16                                |
| <i>flk-1; 35S::AtFLK; 1/4</i>                                                    | 28                        | 16                                |
| <i>flk-1; 35S::AtFLK; 1/5</i>                                                    | 28                        | 12                                |
| <i>flk-1; 35S::AtFLK; 1/6</i>                                                    | 28                        | 12                                |
| <i>flk-1; 35S::AtFLK; 1/7</i>                                                    | 28                        | 13                                |
| <i>flk-1; 35S::AtFLK; 1/8</i>                                                    | 35                        | 15                                |
| <i>flk-1; 35S::AtFLK; 1/9</i>                                                    | -                         | -                                 |
| <i>flk-1; 35S::AtFLK; 1/10</i>                                                   | 28                        | 10                                |
| <i>flk-1; 35S::AtFLK; 1/11</i>                                                   | 31                        | 17                                |
| <i>flk-1; 35S::AtFLK; 1/12</i>                                                   | 28                        | 15                                |
| <i>flk-1; 35S::AtFLK; 1/13</i>                                                   | 28                        | 14                                |
| <i>flk-1; 35S::AtFLK; 1/14</i>                                                   | 31                        | 17                                |
| <i>flk-1; 35S::AtFLK; 1/15</i>                                                   | 31                        | 19                                |
| <i>flk-1; 35S::AtFLK; 1/16</i>                                                   | 35                        | 18                                |
| <i>flk-1; 35S::AtFLK; 1/17</i>                                                   | 31                        | 16                                |
| Segregation ratio (early bolting: late bolting)                                  | 16:0                      |                                   |
| X <sup>2</sup> for 3:1                                                           | 5.33 **                   |                                   |
| X <sup>2</sup> for 15:1                                                          | 1.07 (ns)                 |                                   |
| <b><i>flk-1; 35S::AtFLK; 3/1</i></b>                                             | <b>28</b>                 | <b>16</b>                         |
| <b><i>flk-1; 35S::AtFLK; 3/2</i></b>                                             | <b>38</b>                 | <b>18</b>                         |
| <b><i>flk-1; 35S::AtFLK; 3/3</i></b>                                             | <b>35</b>                 | <b>18</b>                         |
| <b><i>flk-1; 35S::AtFLK; 3/4</i></b>                                             | <b>38</b>                 | <b>17</b>                         |
| <b><i>flk-1; 35S::AtFLK; 3/5</i></b>                                             | <b>35</b>                 | <b>21</b>                         |
| <b><i>flk-1; 35S::AtFLK; 3/6</i></b>                                             | <b>25</b>                 | <b>15</b>                         |
| <b><i>flk-1; 35S::AtFLK; 3/7</i></b>                                             | <b>44</b>                 | <b>22</b>                         |
| <b><i>flk-1; 35S::AtFLK; 3/8</i></b>                                             | <b>44</b>                 | <b>18</b>                         |
| <b><i>flk-1; 35S::AtFLK; 3/9</i></b>                                             | <b>31</b>                 | <b>15</b>                         |
| <b><i>flk-1; 35S::AtFLK; 3/10</i></b>                                            | <b>31</b>                 | <b>19</b>                         |
| <b><i>flk-1; 35S::AtFLK; 3/11</i></b>                                            | <b>28</b>                 | <b>17</b>                         |
| <b><i>flk-1; 35S::AtFLK; 3/12</i></b>                                            | <b>35</b>                 | <b>16</b>                         |
| <b><i>flk-1; 35S::AtFLK; 3/13</i></b>                                            | <b>31</b>                 | <b>16</b>                         |
| <b><i>flk-1; 35S::AtFLK; 3/14</i></b>                                            | <b>31</b>                 | <b>15</b>                         |
| <b><i>flk-1; 35S::AtFLK; 3/15</i></b>                                            | <b>38</b>                 | <b>14</b>                         |
| <b><i>flk-1; 35S::AtFLK; 3/16<sup>b</sup></i></b>                                | <b>71</b>                 | <b>73</b>                         |
| <b><i>flk-1; 35S::AtFLK; 3/17<sup>b</sup></i></b>                                | <b>68</b>                 | <b>64</b>                         |
| Segregation ratio (early bolting: late bolting)                                  | 15:2                      |                                   |
| X <sup>2</sup> for 3:1                                                           | 1.59 (ns)                 |                                   |
| X <sup>2</sup> for 15:1                                                          | 0.86 (ns)                 |                                   |

| T2 plants (genetic background; transgene cassette; family number / plant number) | Number of days to bolting | Total number of leaves at bolting |
|----------------------------------------------------------------------------------|---------------------------|-----------------------------------|
| <i>flk-1; 35S::AtFLK; 2/1</i>                                                    | 35                        | 15                                |
| <i>flk-1; 35S::AtFLK; 2/2</i>                                                    | 38                        | 13                                |
| <i>flk-1; 35S::AtFLK; 2/3</i>                                                    | 28                        | 14                                |
| <i>flk-1; 35S::AtFLK; 2/4</i>                                                    | 35                        | 18                                |
| <i>flk-1; 35S::AtFLK; 2/5</i>                                                    | 38                        | 17                                |
| <i>flk-1; 35S::AtFLK; 2/6</i>                                                    | 44                        | 18                                |
| <i>flk-1; 35S::AtFLK; 2/7</i>                                                    | 31                        | 15                                |
| <i>flk-1; 35S::AtFLK; 2/8</i>                                                    | 31                        | 13                                |
| <i>flk-1; 35S::AtFLK; 2/9</i>                                                    | 31                        | 19                                |
| <i>flk-1; 35S::AtFLK; 2/10</i>                                                   | 28                        | 13                                |
| <i>flk-1; 35S::AtFLK; 2/11</i>                                                   | 44                        | 19                                |
| <i>flk-1; 35S::AtFLK; 2/12</i>                                                   | 31                        | 14                                |
| <i>flk-1; 35S::AtFLK; 2/13</i>                                                   | 28                        | 14                                |
| <i>flk-1; 35S::AtFLK; 2/14</i>                                                   | 35                        | 18                                |
| <i>flk-1; 35S::AtFLK; 2/15</i>                                                   | 38                        | 17                                |
| <i>flk-1; 35S::AtFLK; 2/16</i>                                                   | 38                        | 16                                |
| <i>flk-1; 35S::AtFLK; 2/17</i>                                                   |                           |                                   |
| Segregation ratio (early bolting: late bolting)                                  | 16:0                      |                                   |
| X <sup>2</sup> for 3:1                                                           | 5.33 **                   |                                   |
| X <sup>2</sup> for 15:1                                                          | 1.07 (ns)                 |                                   |
| <i>flk-1; 35S::AtFLK; 4/1</i>                                                    | 31                        | 16                                |
| <i>flk-1; 35S::AtFLK; 4/2</i>                                                    | -                         | -                                 |
| <i>flk-1; 35S::AtFLK; 4/3</i>                                                    | 28                        | 12                                |
| <i>flk-1; 35S::AtFLK; 4/4</i>                                                    | 25                        | 17                                |
| <i>flk-1; 35S::AtFLK; 4/5</i>                                                    | 35                        | 19                                |
| <i>flk-1; 35S::AtFLK; 4/6</i>                                                    | 31                        | 15                                |
| <i>flk-1; 35S::AtFLK; 4/7</i>                                                    | 28                        | 13                                |
| <i>flk-1; 35S::AtFLK; 4/8</i>                                                    | 31                        | 17                                |
| <i>flk-1; 35S::AtFLK; 4/9</i>                                                    | 28                        | 10                                |
| <i>flk-1; 35S::AtFLK; 4/10</i>                                                   | 28                        | 15                                |
| <i>flk-1; 35S::AtFLK; 4/11</i>                                                   | 35                        | 15                                |
| <i>flk-1; 35S::AtFLK; 4/12</i>                                                   | 35                        | 15                                |
| <i>flk-1; 35S::AtFLK; 4/13</i>                                                   | 35                        | 16                                |
| <i>flk-1; 35S::AtFLK; 4/14</i>                                                   | 35                        | 14                                |
| <i>flk-1; 35S::AtFLK; 4/15</i>                                                   | 35                        | 12                                |
| <i>flk-1; 35S::AtFLK; 4/16</i>                                                   | -                         | -                                 |
| <i>flk-1; 35S::AtFLK; 4/17</i>                                                   | 35                        | 13                                |
| Segregation ratio (early bolting: late bolting)                                  | 15:0                      |                                   |
| X <sup>2</sup> for 3:1                                                           | 5.00 *                    |                                   |
| X <sup>2</sup> for 15:1                                                          | 1.00 (ns)                 |                                   |

| Genotype / plant number | Number of days to bolting | Total number of leaves at bolting |
|-------------------------|---------------------------|-----------------------------------|
| Col-0/1                 | 37                        | 18                                |
| Col-0/2                 | 40                        | 17                                |
| Col-0/3                 | 39                        | 17                                |
| Col-0/4                 | 38                        | 16                                |
| Col-0/5                 | 38                        | 19                                |
| Col-0/6                 | 39                        | 18                                |
| Col-0/7                 | 39                        | 17                                |
| Col-0/8                 | 40                        | 16                                |
| Col-0/9                 | 38                        | 16                                |
| Col-0/10                | 35                        | 17                                |
| Col-0/11                | 36                        | 19                                |
| Col-0/12                | 40                        | 19                                |
| Col-0/13                | 36                        | 18                                |
| Col-0/14                | 37                        | 18                                |
| Col-0/15                | 38                        | 18                                |
| Col-0/16                | 37                        | 18                                |
| Col-0/17                | 37                        | 17                                |

| Genotype / plant number | Number of days to bolting | Total number of leaves at bolting |
|-------------------------|---------------------------|-----------------------------------|
| <i>flk-1/1</i>          | 74                        | 67                                |
| <i>flk-1/2</i>          | 74                        | 67                                |
| <i>flk-1/3</i>          | 74                        | 68                                |
| <i>flk-1/4</i>          | 77                        | 67                                |
| <i>flk-1/5</i>          | 67                        | 72                                |
| <i>flk-1/6</i>          | 69                        | 69                                |
| <i>flk-1/7</i>          | 66                        | 71                                |
| <i>flk-1/8</i>          | 77                        | 67                                |
| <i>flk-1/9</i>          | 71                        | 69                                |
| <i>flk-1/10</i>         | 69                        | 71                                |
| <i>flk-1/11</i>         | 72                        | 67                                |
| <i>flk-1/12</i>         | 65                        | 65                                |
| <i>flk-1/13</i>         | 74                        | 65                                |
| <i>flk-1/14</i>         | 65                        | 67                                |
| <i>flk-1/15</i>         | 65                        | 69                                |
| <i>flk-1/16</i>         | 65                        | 67                                |
| <i>flk-1/17</i>         | 63                        | 65                                |

<sup>a</sup> Non-significant ( $\alpha > 0.05$ )

<sup>b</sup> Non-transgenic T2 plants as tested by PCR

<sup>c</sup> '-' indicates plants which died before bolting

\*  $\alpha = 0.05$ ; \*\*  $\alpha = 0.01$

**Supplementary Table 3.** Unpaired t-test for number of days to bolting (DTB) and total number of leaves at bolting (TNL) between *BvFLK* or *FLK* transformants and non-transgenic *A. thaliana* plants within six T2 populations.

| T2 family<br>(genetic background;<br>transgene cassette; family<br>number) | DTB (mean $\pm$ standard<br>deviation)   |                                         | T-test value<br>for DTB<br>(probability) | TNL (mean $\pm$ standard<br>deviation) |                              | T-test value<br>for TNL<br>(probability) |
|----------------------------------------------------------------------------|------------------------------------------|-----------------------------------------|------------------------------------------|----------------------------------------|------------------------------|------------------------------------------|
|                                                                            | Transgenic<br>plants <sup>a</sup>        | Non-<br>transgenic<br>plants            |                                          | Transgenic<br>plants                   | Non-<br>transgenic<br>plants |                                          |
| Col-0; 35S:: <i>BvFLK</i> ; #7                                             | 27.77 $\pm$ 2.89<br>(n=13 <sup>b</sup> ) | 38.00 $\pm$ 2.16<br>(n=4 <sup>b</sup> ) | 6.48 (0.00)                              | 15.23 $\pm$ 1.79                       | 18.50 $\pm$ 0.58             | 3.53 (0.00)                              |
| Col-0; endo:: <i>BvFLK</i> ; #6                                            | 28.46 $\pm$ 1.66<br>(n=13 <sup>b</sup> ) | 38.00 $\pm$ 0.82<br>(n=4 <sup>b</sup> ) | 10.89 (0.00)                             | 15.31 $\pm$ 1.70                       | 17.00 $\pm$ 1.15             | 1.84 (0.09)                              |
| Col-0; 35S:: <i>AtFLK</i> ; #5                                             | 27.23 $\pm$ 2.05<br>(n=13 <sup>b</sup> ) | 38.75 $\pm$ 0.96<br>(n=4 <sup>b</sup> ) | 10.71 (0.00)                             | 15.00 $\pm$ 2.00                       | 19.00 $\pm$ 1.41             | 3.69 (0.00)                              |
| <i>flk-1</i> ; 35S:: <i>BvFLK</i> ; #18                                    | 34.14 $\pm$ 3.06<br>(n=14 <sup>b</sup> ) | 67.50 $\pm$ 2.12<br>(n=2 <sup>b</sup> ) | 14.70 (0.00)                             | 16.29 $\pm$ 1.68                       | 68.00 $\pm$ 4.24             | 34.56 (0.00)                             |
| <i>flk-1</i> ; endo:: <i>BvFLK</i> ; #5                                    | 32.92 $\pm$ 3.62<br>(n=13 <sup>b</sup> ) | 68.50 $\pm$ 1.91<br>(n=4 <sup>b</sup> ) | 18.60 (0.00)                             | 15.85 $\pm$ 2.41                       | 66.75 $\pm$ 2.22             | 37.52 (0.00)                             |
| <i>flk-1</i> ; 35S:: <i>AtFLK</i> ; #3                                     | 34.13 $\pm$ 5.60<br>(n=15 <sup>b</sup> ) | 69.50 $\pm$ 2.12<br>(n=2 <sup>b</sup> ) | 8.63 (0.00)                              | 17.13 $\pm$ 2.26                       | 68.50 $\pm$ 6.36             | 24.94 (0.00)                             |

<sup>a</sup> Transgenic plants were identified by PCR analysis as described in Materials and Methods.

<sup>b</sup> Number of, respectively, transgenic or non-transgenic plants within a given T2 population.

**Supplementary Table 4** Unpaired t-test for number of days to bolting (DTB) and total number of leaves at bolting (TNL) between *BvFVE1* transformants and non-transgenic *A. thaliana* plants within four T2 populations.

| T2 family<br>(genetic background;<br>transgene cassette; family<br>number) | DTB (mean $\pm$ standard<br>deviation)   |                                          | T-test value<br>for DTB<br>(probability) | TNL (mean $\pm$ standard<br>deviation) |                              | T-test value<br>for TNL<br>(probability) |
|----------------------------------------------------------------------------|------------------------------------------|------------------------------------------|------------------------------------------|----------------------------------------|------------------------------|------------------------------------------|
|                                                                            | Transgenic<br>plants <sup>a</sup>        | Non-<br>transgenic<br>plants             |                                          | Transgenic<br>plants                   | Non-<br>transgenic<br>plants |                                          |
| Col-0; 35S:: <i>BvFVE1</i> ; #9                                            | 35.22 $\pm$ 3.95<br>(n=23 <sup>b</sup> ) | 36.50 $\pm$ 9.19<br>(n=2 <sup>b</sup> )  | 0.40 (0.69)                              | 15.65 $\pm$ 3.39                       | 19.00 $\pm$ 8.49             | 1.57 (0.13)                              |
| Col-0; 35S:: <i>BvFVE1</i> ; #16                                           | 31.43 $\pm$ 4.24<br>(n=14 <sup>b</sup> ) | 31.73 $\pm$ 1.68<br>(n=11 <sup>b</sup> ) | 0.22 (0.82)                              | 12.86 $\pm$ 2.57                       | 12.36 $\pm$ 1.12             | 0.59 (0.56)                              |
| <i>fve-7</i> ; 35S:: <i>BvFVE1</i> ; #1                                    | 66.62 $\pm$ 7.08<br>(n=13 <sup>b</sup> ) | 65.75 $\pm$ 4.33<br>(n=8 <sup>b</sup> )  | 0.31 (0.76)                              | 33.31 $\pm$ 9.27                       | 36.88 $\pm$ 6.24             | 0.38 (0.70)                              |
| <i>fve-7</i> ; 35S:: <i>BvFVE1</i> ; #32                                   | 59.95 $\pm$ 7.26<br>(n=21 <sup>b</sup> ) | - <sup>c</sup>                           | 2.11 (0.04) <sup>d</sup>                 | 32.76 $\pm$ 7.91                       | - <sup>c</sup>               | 1.32 (0.20) <sup>d</sup>                 |

<sup>a</sup> Transgenic plants were identified by PCR analysis as described in Materials and Methods.

<sup>b</sup> Number of, respectively, transgenic or non-transgenic plants within a given T2 population.

<sup>c</sup> T2 family #32 did not include non-transgenic plants.

<sup>d</sup> The means of DTB and TNL in transgenic plants was compared against the respective means in the non-transgenic plant group of family #1 which was grown in parallel.

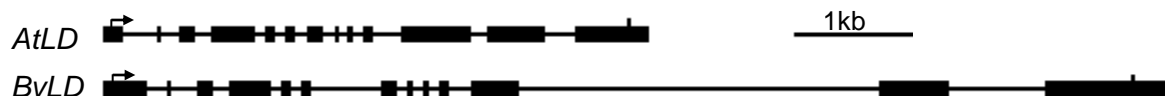

At LD ---DARKKEEIEICSSVESLMELIDSQKGLFHSQIDQLQDVFVAQCKLTCVWPLAQEMAA  
 BvLD MEVLRKDPSEIDIGNSHESFQKGLLQKELFHNQIDQLRNIVYTQCKLTCVWPLSQEMAA

HD

At LD CALSIRKICKRPRDLLNPKARKYIQAVFAIKDAISKRESREISALFCITVAQVREIFVITQR  
 BvLD CALSINIKCRPRDLLNPKARKYIQAVESIKDAISKRELRREICALFCITVTQVREIFACQR

At LD TRVRFQVRLSREKRVMSNTHALQDDGVPENMNA TNHYVFPVPLNSIHFACSSISWCEGETV  
 BvLD SRVRFIVRLSREKRAVRSATKEIQDQVSAADADLMHPLDP TPLSSICPS-----NAEEVP

At LD ALIPPEDEIPDTSISDRYFVENIFSLIRKEETFSCQVKLMRWIMQIQDASVLIWF LSRGG  
 BvLD SCSNQDEWIPCLGSEERFVENIFSSMCKEETFSCQVKLMRWIIMQIENPLILGWF LMRGG

At LD VVILITTWLSQLAAASEQTSTVLLILKVLCHLPIHFAISPRNMSAILGSVWCLRFYRIPDISEN  
 BvLD VVILATWLSQAAASEQTSTVSAVILKVLCHLPIHRAVPAHMSAVLGVWVCLRFYRIPDISEN

At LD RARCLLSRUTKLFARIQAMKRRQRMSQIDSCSCILLRQSLARINED-----SNMPEDII  
 BvLD RARVLLSRWSRIRFAKSQLRRKPCVPTAGCSQPDIDLSCRAELVCDGSGWQSSVDDHDII

At LD SLNNGKSNVWRVRIEESQCPKRLILTADDSTKPHILCSNP SYMKERRKVCNVEQPCQKAAAC  
 BvLD ALSYVGPDDTRKVTILEVVKLLTASSDDIMKRLILGTSTAHNKERRKVCNVEQPCQKACS

At LD KSPQTVRICTSGSRPMSADDIQKAKMRQLYMQSKMSRKLPLPSAICD SKIVAIFRPLAI  
 BvLD KS-QPVAVLANQRPPIIADRIQKAKMRQIMQSNKRPTI-----GEMKPSLI

At LD HSAKDSPPIQNNEAKTSDT PVLSTIQPVNCFSTIQPVNCFSAVQPVNCPVAVQPVNCP  
 BvLD TNDLLSASRAYLRKLEAQKARLTPBK---SSTKQVECPDHRITFD-----

At LD LQPVNCPSAVIVPVQAD EIKKPSTPPKRSISKVGVMMRMSQQIKMNRDHWG  
 BvLD -----QKEDLIERCRRVQIPWRAPP-

At LD MEEDELWRVAACGASKEADVQRNRMRRERETTYQSITQTIEMPKRPPDRENDYDDSLTPE  
 BvLD -EIQLIARVACGESKELGCRNRDREKRTIYRMLHEVEMPKRPPDRENDYDDTLTPE

At LD IFSQCPPEESLTPQDSDERRIAAGCAITSSSISPEPDLELLVALLRNPDLVVALTSG  
 BvLD IPIIDQLPD---SDGADHPDENLNDSSDHSIS--SQAEPPDLELLVALLRNPDLVVALTSG

At LD KPSMIDAGQDMVKLLDVRKTC---APNSSSSSMKQVEERVWVSLPS-----  
 BvLD QASGLSSEITVTKLLDILKSCGCEALLNGQASGKSEVWVWVSLPSPTPTRNVEVSLPSPT

At LD -----PTPSINPCMSGICQ-EGIDMPFERQNQ-----VGTAVARS-----CT  
 BvLD PPSRFEVSLPSPTPSINPCMSGICITTCQAAMPFIRHTMAVQDSAVVTTAVITSDRPNQCG

At LD QLR-----VGSIMQWHQTN-----ECSIPRHAPSAYSNSITLAHT  
 BvLD TIQIQFASAPAVVPSLPQYRSQTIQILGPVTHSLSLIPEDHITFYAPNPAGNPPIMNS

At LD EREQQQYMQPKLBNHLHFQIQQQQFISTTSYAVREPVQMGITGTSSSIPRSQCSQNSYYSH  
 BvLD IPSYTRQTPRRIEIS---HPQPELYPLHEDSNTEMVKRRECLSHMLPENNHVITQWYNTIP

At LD QENEIASASQVTSYQGNQYMSMPCYEWSVSDNSPSRNQLNMRQQQ-----QCASRK  
 BvLD ---ITTCQPDPTIEMNSYCTCGPCYELRNPNENSFCPMRYPPRHGHGWSYPRGREG

At LD HDS---STHPYDQV-----NEMMR-----  
 BvLD YCPPDRLSRHQSIRGSSCGCVWRPDMGCDPRR

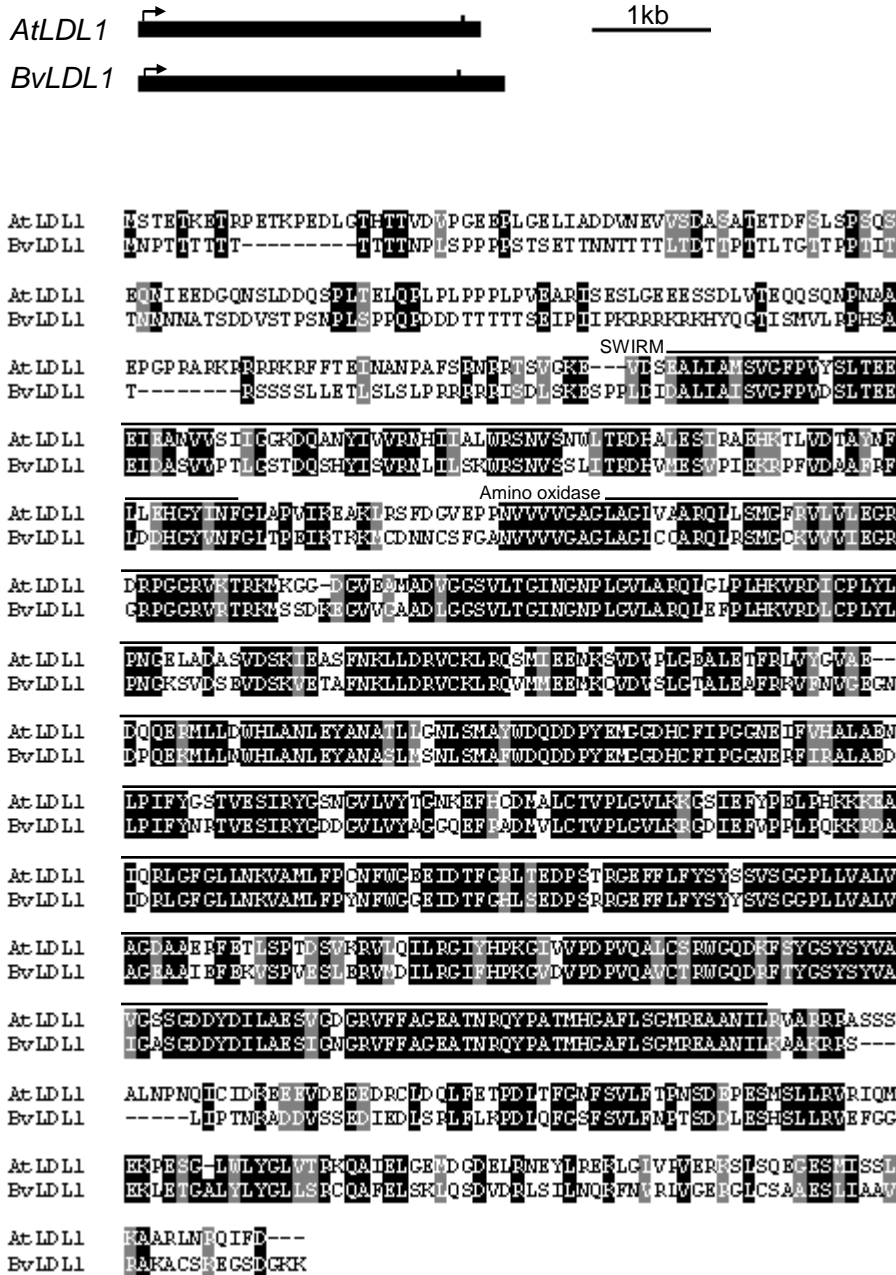

**Suppl. Fig. 1.** Sequence and structure of the autonomous pathway gene homologs *BvLD* and *BvLDL1*. (A) Exon-intron structure of *BvLD*, *BvLDL1* and the respective *A. thaliana* genes (*LD*, accession number CAJ53849; *LDL1*, accession number NP\_176471). Exons are indicated as black rectangles, the position of start and stop codons is indicated by arrows and vertical bars, respectively. (B) Pairwise sequence alignments and domain organization. The alignments were generated using ClustalW2 (<http://www.ebi.ac.uk/Tools/clustalw2/index.html>). Identical and similar residues are highlighted by black or grey boxes, respectively. The position of protein domains according to Pfam 22.0 (<http://pfam.sanger.ac.uk/>) is marked by horizontal lines above the alignment. Two putative nuclear localization signals (NLS) in *LD* according to Lee *et al.* (1994) are indicated. HD, homeo domain; SWIRM, SWI3, RSC8 and MOIRA domain.

gtatatgtcattttgttggttgattgatgttgcatcactctttaaacttttttgc  
aaatgaacgcaaaacaattagcatcccgtagtctgcacaggtgtaaacgagtaagtg  
cgttcttttcatctgaataacctgagcttatctaaactgaacttattggatctgaactgaa  
ct<sup>CPBCSPOR</sup>tattagacttgattggaccttattcaacttattggacctgattgaacctattggaactt  
attgaacctgattgaaacttattgacctgattggaac<sup>CPBCSPOR</sup>tattagatcttattggacctgatt  
gaaacgtacaccttattggacctgattaaaact<sup>CPBCSPOR</sup>tattagaccttattgaaactaatggaac  
ttatttgacct<sup>CPBCSPOR</sup>tattagcaaaaaaattgatgagtataacataa<sup>Root motif</sup>atatt<sup>GARE2</sup>taacgta  
taccctcaaaaatttattatgaaa<sup>HDZIP2AT</sup>taataattataaaatttgc<sup>PYRIMIDINEBOX</sup>cctttt<sup>Root motif</sup>aaaaatattca  
ctattaat<sup>ARFAT</sup>tgctcttac<sup>IBOXCORE</sup>gataaacaatttaa<sup>GT1</sup>gaaaaaaaaaataactatttatatacttg  
tctatctataacttttaccactaataatataatagtctt<sup>GT1</sup>ggtaaatagtaatatgaataata  
aaataatagacaaaaatacaagtataaactgtacattgtgct<sup>NTBBF1ARROLB</sup>actttaattcaaaaaattt  
aataa<sup>GARE</sup>taacaaatcagctaatagtaatatgaataataaaaacaatagacaataataataaaca  
tttaataaaaataatagaccataatacaagtataatad<sup>GATA</sup>gataaatcattgctg<sup>NTBBF1ARROLB</sup>actttaat  
taaaattctaataataacataatcaactaatagt<sup>GATA</sup>gatagaataataaaaataatggacaata  
atacagatgtttattgatcattgactatttggattttattgaaacttattggacctgattag  
acctaatggaaactgattgaaacttattgacctgattggaacttattgacctgattgga  
cttattgcaacttgattgaaacttattg<sup>CATATG</sup>catatgattagaacttattatactgattgaaatt  
tattcgaccttattaacttaattggacctaatataaacttatctgaactttttttttttt  
ttttgaaatagtattctgaacttaacttgttggacataaaaacttaatt<sup>GT1CORE</sup>ggttaaggggaggag  
aacgcaactacgtg<sup>GT1</sup>tataataaaaaaataatcccc<sup>GT1</sup>gaaaaaagaattaca<sup>GT1</sup>gaaaaagggaa  
cgccgctcagaccctgagcaatataaacctagaaacgggtagcaaaatagtacaacaccag  
cttcataaacttcgcttattcttctctttcacaccgttcttctctctgcggaacttctctctc  
tcaaatctctgctacttttacttctcttgagctgctacttttgttcgct<sup>HDZIP2AT</sup>taatcattabaa  
tatgtaagt<sup>PYRIMIDINEBOX</sup>ccttttctctctttatcttctgtttctatttctatttctattttgtcatgt  
tcaatggaattttctagggtctctgatcttagggtttatttttgttgcagtttgatttgctt  
gttctcgtttgttttgcgattttgtttctgtatgatttagttgagattgtagt<sup>INRNTPSADB</sup>ttcaat  
t<sup>GT1</sup>ggtaaactctatctagggttttcataaattagggtttttcggattttc  
<sup>PYRIMIDINEBOX</sup>cccttttttaggttagaatatagaaagtgg<sup>T-Box</sup>actttgaa<sup>GATA</sup>gatagtgaagtgggtgctgct  
gaat<sup>GATA</sup>gatactttttgatgttgcgttcggttggcaattatttttcttcattatctttttat  
atcgatttcttttgattgtcatttttggttg<sup>Root motif</sup>atatttataacggtctgcagagtggtcaga

**Suppl. Fig. 2.** *BvFLK* promoter and 5' UTR. 1860 bp of the genomic sequence upstream of the start codon are shown. Bold letters indicate a putative TATA-box according to the transcription start site prediction program TSSP (<http://www.softberry.ru/berry.phtml>). The 5' UTR is indicated in italics. An intron within the 5' UTR is underlined. Transcription and splicing of the 5' UTR was verified by RT-PCR and sequencing. Root motifs (Elmayan and Tepfer 1995) and putative phytohormone- (ARFAT (Nag *et al.*, 2005), CATATG motif (Xu *et al.*, 1997), CPBCSPOR (Fusada *et al.*, 2005), GARE (Ogawa *et al.*, 2003), GARE2 (Sutoh and Yamauchi 2003), PYRIMIDINEBOX (Mena *et al.*, 2002), NTBBF1ARROLB (Baumann *et al.*, 1999)) and light-regulated promoter elements (GT1 and GT1CORE consensus sequences (Zhou 1999), IBOX core motif (Terzaghi and Cashmore, 1995), GATA box (Reyes *et al.*, 2004), INRNTPSADB (Nakamura *et al.*, 2002), T-box (Chan *et al.*, 2001), HDZIP2AT (Ohgishi *et al.*, 2001)) are boxed. We note that all four CPBCSPOR cytokinin-response elements (TATTAG) are clustered ~0.8-1.0 kb upstream of the transcription start site and the flanking nucleotides are conserved for these four elements, thus giving rise to a 9 nt motif, CTTATTAGA.



(A)

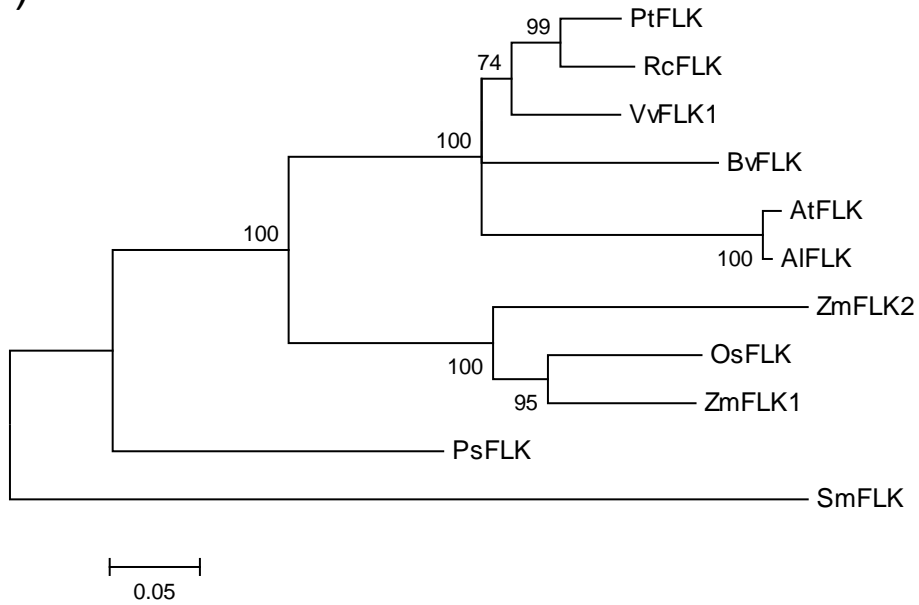

(B)

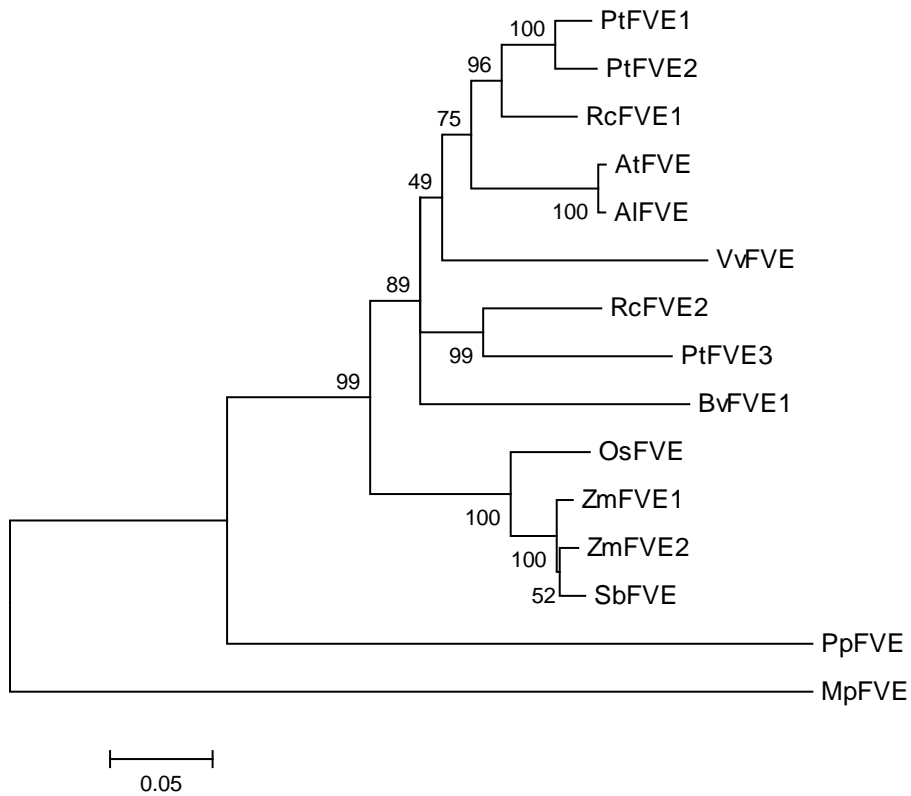

(C)

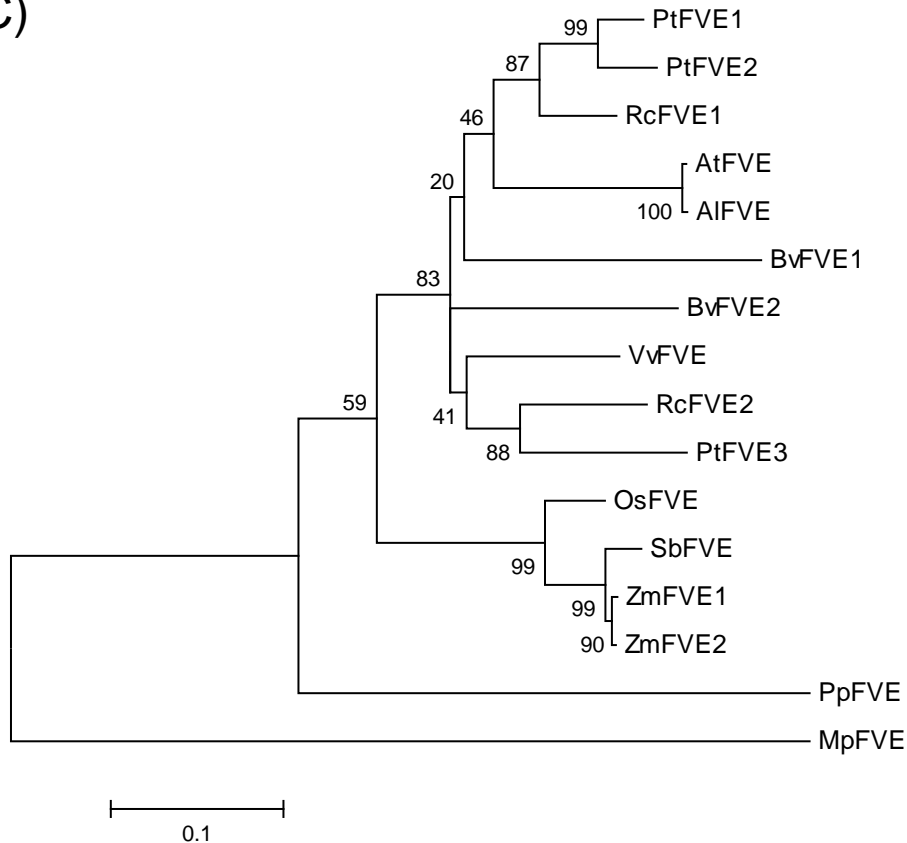

**Suppl. Fig. 3.** Phylogenetic analysis of *FLK* (A) and *FVE* (B,C). Included are all putative plant orthologs retrieved from the NCBI RefSeq protein database (<http://www.ncbi.nlm.nih.gov/refseq>) using blastp and bidirectional best hit analysis as described in Materials and Methods. (A) Unrooted neighbor-joining tree including *A. thaliana* FLK (AtFLK), BvFLK, *Arabidopsis lyrata* FLK (AIFLK, XP\_002884454.1), *Oryza sativa* FLK (OsFLK, AAL31692.1), *Picea sitchensis* FLK (PsFLK, ABK24418.1), *Populus trichocarpa* FLK (PtFLK, XP\_002319087.1), *Ricinus communis* FLK (RcFLK, XP\_002521945.1), *Selaginella moellendorffii* FLK (SmFLK, XP\_002968912.1), *Vitis vinifera* FLK (VvFLK, XP\_002269249.1), *Zea mays* FLK1 (ZmFLK1, NP\_001151605.1), and *Z. mays* FLK2 (ZmFLK2, NP\_001148654.1). (B) Unrooted neighbor-joining tree including *A. thaliana* FVE (AtFVE), BvFVE1, *A. lyrata* FVE (AIFVE, XP\_002886035.1), *Micromonas pusilla* FVE (MpFVE, XP\_003058120.1), *Physcomitrella patens* FVE (PpFVE, XP\_001776478.1), *P. trichocarpa* FVE1 (PtFVE1, XP\_002332825.1), *P. trichocarpa* FVE2 (PtFVE2, XP\_002330494.1), *P. trichocarpa* FVE3 (PtFVE3, XP\_002327543.1), *R. communis* FVE1 (RcFVE1, XP\_002514113.1), *R. communis* FVE2 (RcFVE2, XP\_002527406.1), *Sorghum bicolor* FVE (SbFVE, XP\_002456237.1), *V. vinifera* FVE (VvFVE, XP\_002282044.1), *Z. mays* FVE1 (ZmFVE1, NP\_001105067.1), and *Z. mays* FVE2 (ZmFVE2, NP\_001105191.1). (C) Unrooted neighbor-joining tree including a partial predicted protein sequence of BvFVE2 (corresponding to nucleotide positions 3 – 629 of EST EG550040) and all proteins in (B), except that for tree construction only the partial amino acid sequences were used that align to the partial BvFVE2 sequence. Bootstrap values as percentages of 1000 replicates are given at the branching points of the trees.

```

                                NLS
AtFVE  MESDEAAAVSPQATTPSGGTGASGPKKRGRKPKTKEDSQTPSSQQQSDVKMKESSGKKTQQ
BvFVE1  -----MTEKGRGKGG
BvFVE2  -----
OsFVE   -----MKEKGSRL--

CAF1c
AtFVE  ---SPSVDEKYSQWKGLVPILYDWLANHNLVWPSLSCRWGPQLEQATYKNRQRLYLSEQT
BvFVE1  KGGALTVDEKYSQWKS LVPILYDWLANHNLVWPSLSCRWGPQLEQATYKNRQRLYLSEQT
BvFVE2  -----
OsFVE  ---AAVDERVYAQWKS LIPVLYDWLANHNLVWPSLSCRWGPQLEKATYKNRQRLYLSEQT

WD1
AtFVE  DGSVPNTLVIANCEVVKPRVAAAEHISQFNEEARSPFVKKYKTIHPGGEVNRIRREL PQNS
BvFVE1  DGSVPNTLVIANVEVVKPRVAAAEHISQFNEEARSPFVKKFKTIHPGGEVNRIRREL PQNS
BvFVE2  -----
OsFVE  DGTVPNTLVIANCEVVKPRVAAAEHISQFNEEARSPFVKKYKTIHPGGEVNRIRREL PQNS

WD2
AtFVE  KIVATHDSDPVL IWDVETQPNRHAVLGAANSRPDLILTGHQDNAEFALAMCPTPEFVLS
BvFVE1  NIVATHDSDPVL IWDVETQPSRHAIVLGAHSSRPDLILTGHQDNAEFALAMCSCPELVLS
BvFVE2  -----TREP VVLS
OsFVE  KTIATHDSDPVL IWDVETQPNRQAQLAQME SRPDLILRGRHDI AEFALAMCPEEPVLS

WD3
AtFVE  GGKDKSVVLSIQDHIITITGTD--SKSSGS--IKQTGEGTDKN---ESPITVGRGVY
BvFVE1  GGKDKLVVLSIQDHIITLATEPGGAKSISGSSNTKFASSKADKTNGNADSPVGRGIY
BvFVE2  GGKDRSVVLSIQDHIITATASDPSNKPQSGATIVKQNG-----ESPITVGRGIF
OsFVE  GGKDKSVVWWSIQDHIISALGDS--SKTESSPGASGSKGKTANDK---DSPKVDPRGIF

WD4
AtFVE  HGHEDTVEDVAFSPPTSAQEFCSVGGDSCLILWDARTGTNPVTKVEKAHDADLHCVDWNP
BvFVE1  KGHDDTVEDVQFCPTSAQEFCSVGGDSCLILWDARTGFINPASKVEKAHDADLHCVDWNP
BvFVE2  QGHEDTVEDVQFCPKSSQEFCSVGGDSCLILWDARS GSDPVIKVEKAHNADLHCVDWNP
OsFVE  LGHDS TVEDVQFCPSAQEFCSVGGDSCLILWDARS GTGPAVKVEKAHGGDVHCVDWNLH

WD5
AtFVE  DENLILTGSADNIVRLFDRRKL TANGVGSPIYKFEHGKAAVLCVQWSPDKSSVFGSSAED
BvFVE1  DENLILTGSADNSVHMFDRRNLITANGVGSPIYKFEHGKAAVLCVQWSPHNRSTVFGSSAED
BvFVE2  DENYILTGSADSSVRMFDRRNLTSAGVGSPIYKFEHGKAAVLCVQWSPDNPVTVFGSSAED
OsFVE  DWNVILTGSADNSVRMFDRRNLGSGGAGTPVHKFEHGKAAVLCVQWSPDKASVFGSSAED

WD6
AtFVE  GLLNIWDYDRVSKKSDRA---AKSPAGLFFQHAGHRDKVVDVFWN ASDPWTIVSVSDDC
BvFVE1  GLLNIWDYEKAGNMKKTETGNRI PDYPAGLFFRHAGHRDKVVDVFWNSIDPWTIVSVSDDC
BvFVE2  GVLNIWDYEKVGGKKEKRG-ARTPNAPDGLFFLMLG-----KWIIRG---LISE---
OsFVE  GFLNVDVHEKVGKKN-----PNAPAGLFFQHAGHRDKIVDFHWNSSDPWTIVSVSDDG

AtFVE  EITGGGGTLQIWRMSDLIYRPEEVEVAELEKFKSHVMTCAKSP
BvFVE1  SSSAGGGTLQIWRITIDL IYRPEDEVLAELDKFRSHVITCPS--
BvFVE2  -----
OsFVE  ESTGGGGTLQIWRMSDLIYRPEDEVLAELNFKTHLASCAPRS

```

**Suppl. Fig. 4.** Multiple sequence alignment including *A. thaliana* FVE (AtFVE), BvFVE1, the putative translation product of the largest open reading frame in the *B. vulgaris* EST EG550040 (BvFVE2), and OsFVE. Asterisks indicate a valine and a lysine residue which are conserved between FVE, BvFVE2 and OsFVE. NLS, putative nuclear localization signal (Ausin *et al.*, 2004); CAF1c, CAF1 subunit C / histone binding protein RBBP4 domain; WD, WD40 repeat domain. A potential zinc binding site (unfilled box) in WD6 (Kenzior and Folk, 1998) is also indicated.
